# Supplementary material for: Synthetic beta cells for fusion-mediated dynamic insulin secretion
Source: Springer Nature journal article supplement (doi:10.1038/nchembio.2511), 2017-10-30
Supplement: 41589_2018_BFnchembio2511_MOESM1_ESM.pdf [file 41589_2018_BFnchembio2511_MOESM1_ESM.pdf]

## Supplementary Information

### Synthetic $\beta$ -cells for fusion-mediated dynamic insulin secretion

Zhaowei Chen<sup>1,2,4</sup>, Jinqiang Wang<sup>1,2,4</sup>, Wujin Sun<sup>1,2</sup>, Edikan Archibong<sup>1</sup>, Anna R. Kahkoska<sup>3</sup>, Xudong Zhang<sup>1,2</sup>, Yue Lu<sup>1,2</sup>, Frances S. Ligler<sup>1</sup>, John B. Buse<sup>3</sup> and Zhen Gu<sup>1,2,3,\*</sup>

<sup>1</sup>Joint Department of Biomedical Engineering, University of North Carolina at Chapel Hill and North Carolina State University, Raleigh, NC 27695, USA

<sup>2</sup>Division of Pharmacoengineering and Molecular Pharmaceutics and Center for Nanotechnology in Drug Delivery, Eshelman School of Pharmacy, University of North Carolina at Chapel Hill, Chapel Hill, NC 27599, USA

<sup>3</sup>Department of Medicine, University of North Carolina School of Medicine, Chapel Hill, NC 27599, USA

<sup>4</sup>These authors contributed equally to this work.

\*Corresponding author. Email: [zgu@email.unc.edu](mailto:zgu@email.unc.edu)

## Supplementary Results

### Supplementary Figures:

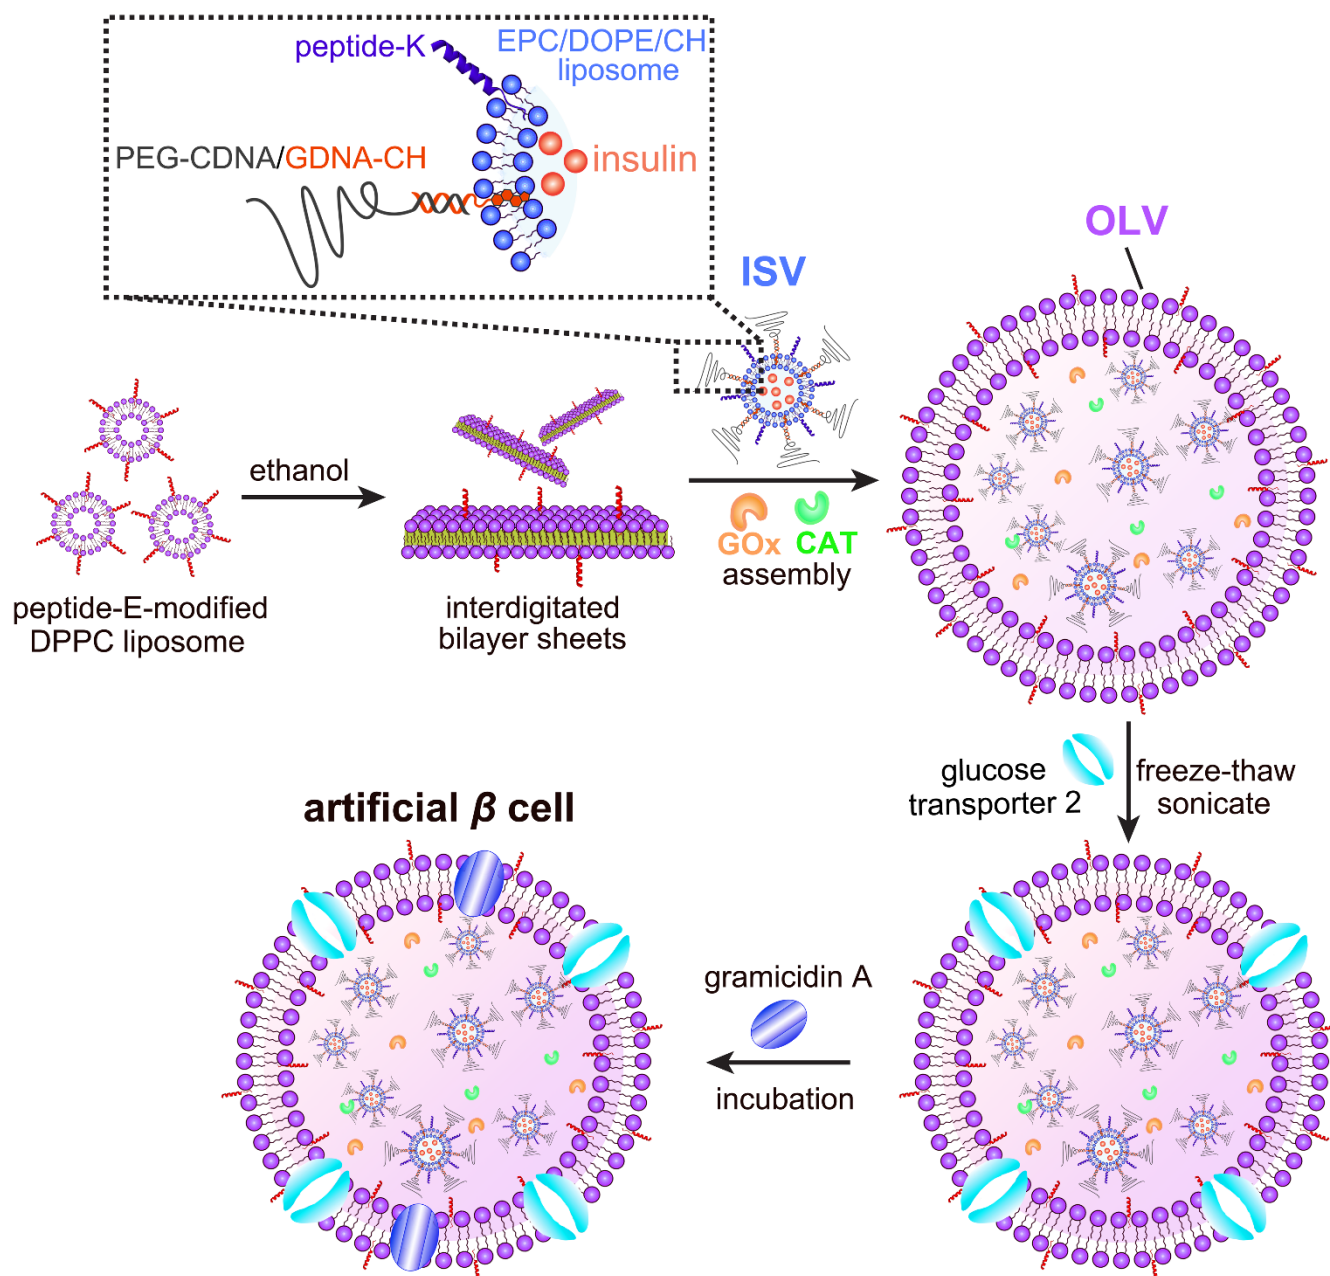

**Supplementary Figure 1** | Schematic illustration of the design and synthesis of the artificial  $\beta$ -cell. GOx, CAT, ISV and OLV are abbreviations for glucose oxidase, catalase, inner small vesicle and outer large vesicle, respectively.

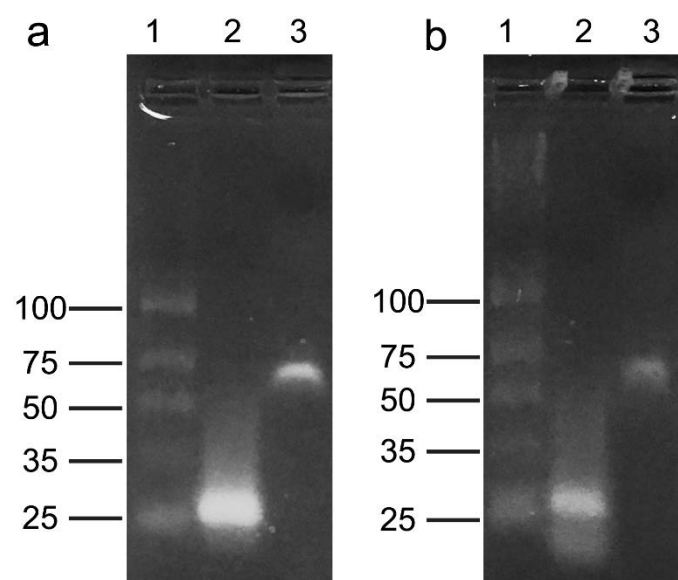

**Supplementary Figure 2** | **a**, Agarose (2%) electrophoresis of DNA ladder (lane 1), cytosine-rich DNA (CDNA, lane 2) and PEG<sub>5000</sub> conjugated CDNA (lane 3); **b**, Agarose (2%) electrophoresis of DNA-ladder (lane 1), control DNA1 (lane 2) and PEG<sub>5000</sub> conjugated DNA1 (lane 3).

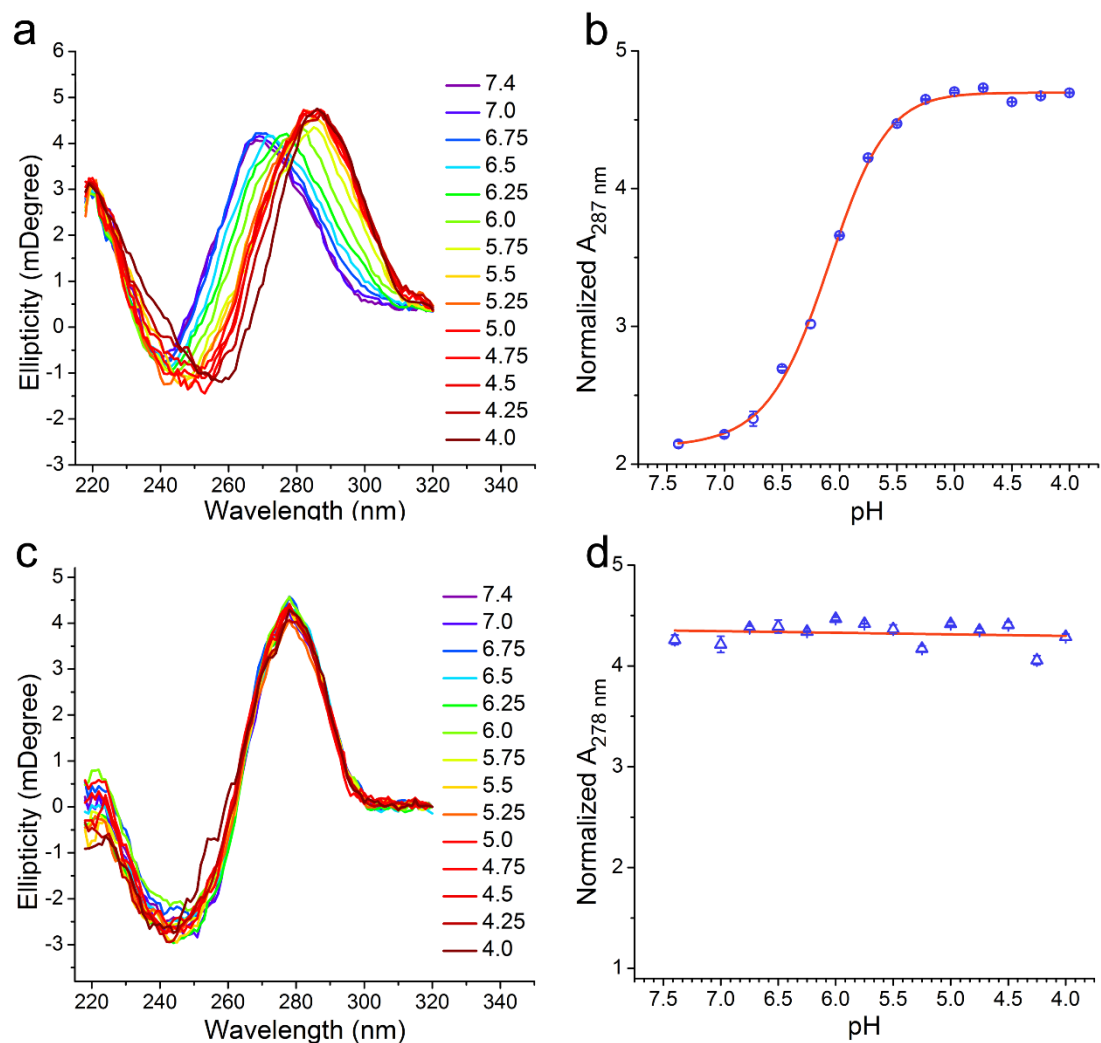

**Supplementary Figure 3** | CD spectra of PEG-CDNA/GDNA-CH (a) and PEG-DNA1/DNA2-CH (c) that illustrate DNA conformational changes at different pH's. **b**, the CD intensity of the characteristic band of tetraplex DNA (summation of i-motif and G-quadruplex) around 287 nm versus different pH values while **(d)** shows the CD intensity of the characteristic band of duplex DNA at 278 nm versus pH values. From the results, it can be concluded that PEG-CDNA/GDNA-CH dehybridized and formed tetraplexes below pH 5.5 while the control PEG-DNA1/DNA2-CH showed no dissociation during the studied pH range. Data points represent mean  $\pm$  SD (three independent experiments per group; n=3).

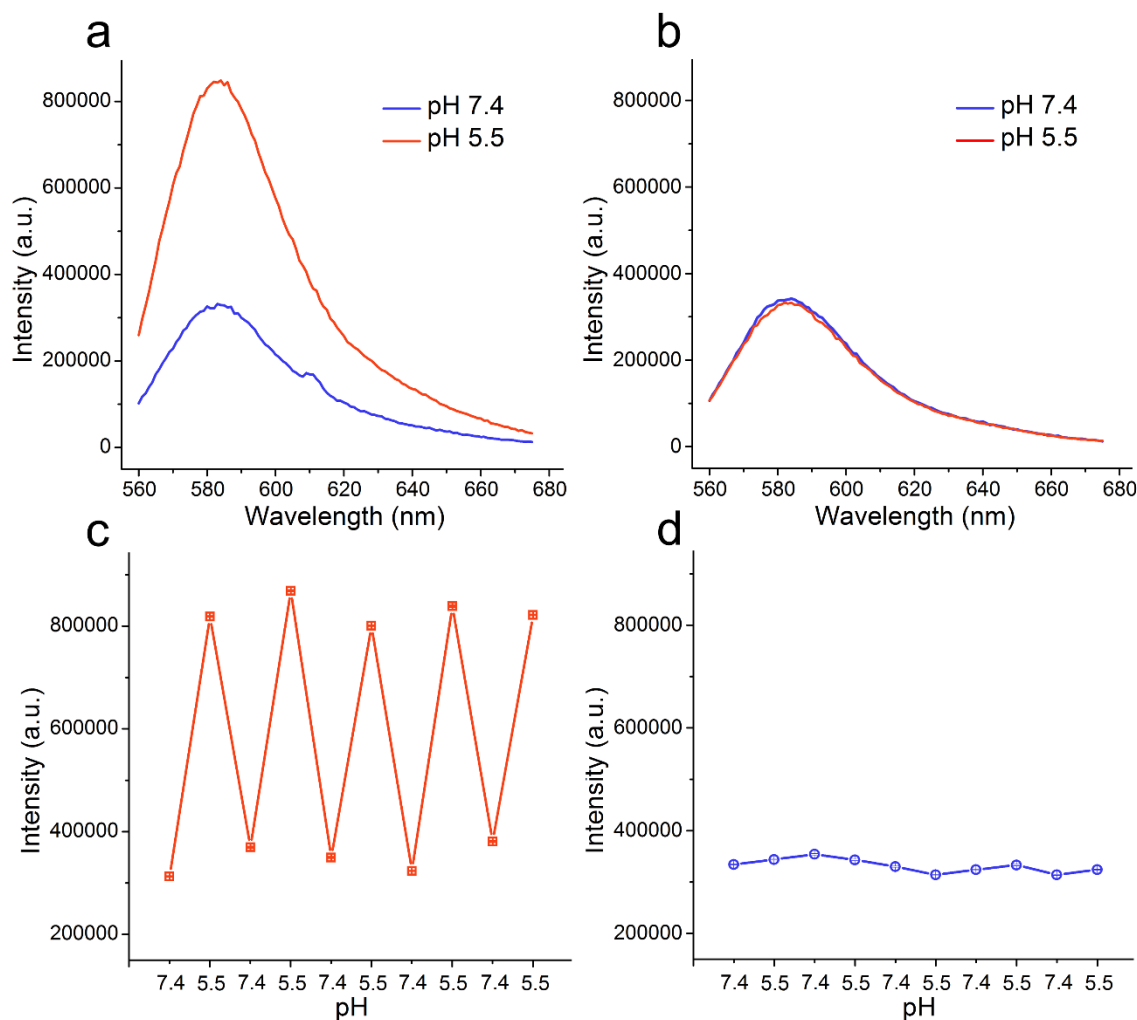

**Supplementary Figure 4** | Reversible, pH-controlled attachment/detachment of PEG shield on the ISV surface studied using a fluorescent resonance energy transfer (FRET) assay. Fluorescent spectra of (a) PEG<sub>5000</sub>-conjugated C-rich DNA (labeled with tetramethylrhodamine, DNA-donor)/cholesterol-ended G-rich DNA (labeled with IAbRQ, DNA-acceptor)-inserted ISVs and (b) PEG<sub>5000</sub>-DNA1 (labeled with DNA-donor)/DNA2 (labeled with DNA acceptor)-cholesterol-inserted ISVs at pH 7.4 and pH 5.5 with excitation at 555 nm. See supplementary Table 1 for DNA sequence details. (c) and (d), respectively showed the fluorescence intensity of DNA-donor in (a) and (b) at different cycles of switching pH at 7.4 and 5.5. The fluorescence intensity at each cycle was measured 20 min after switching the pH. Data points represent mean  $\pm$  SD (three independent experiments per group; n=3).

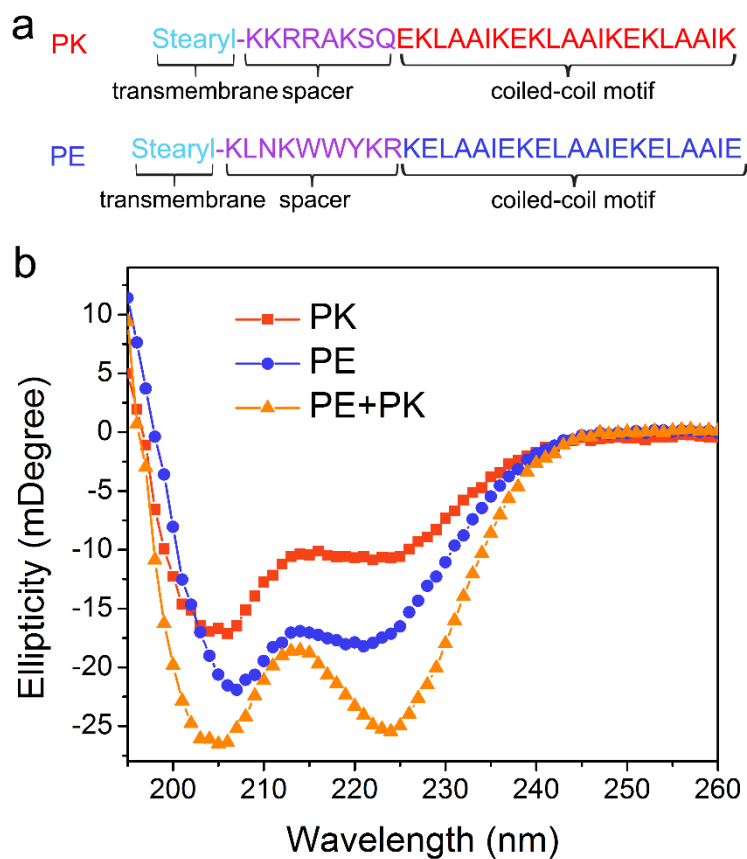

**Supplementary Figure 5** **a**, Sequences of peptide-K and peptide-E with three components—a transmembrane domain, a spacer and a recognition motif, mimicking the membrane fusion SNARE proteins (SNARE = soluble NSF attachment protein receptor). The sequences were designed by modifying previously reported peptides.<sup>30, 31</sup> **b**, CD spectra of peptide-E, peptide-K, and peptide-E/peptide-K. From the CD spectra it can be seen that peptide-K show a substantial  $\alpha$ -helical content ( $[\theta]_{220\text{nm}}/[\theta]_{208\text{nm}}$  is  $\sim 0.71$ ), whereas peptide-E adopts a predominantly random coil structure. After mixing, the  $\alpha$ -helix content increases as the ratio of  $[\theta]_{220\text{nm}}/[\theta]_{208\text{nm}}$  is around 1, confirming the formation of coiled-coil structures between peptide-E and peptide-K.

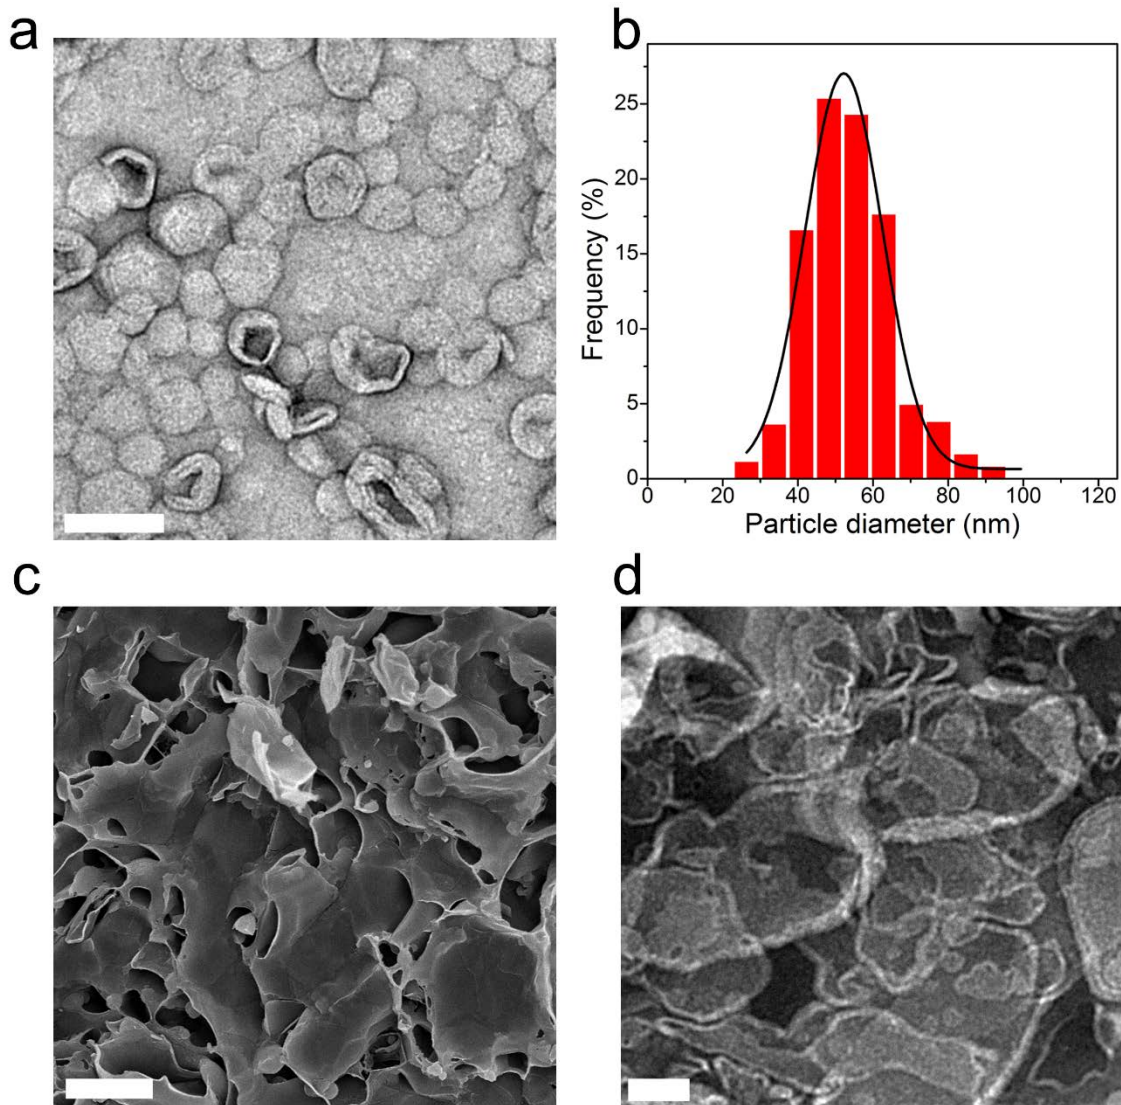

**Supplementary Figure 6** | **a**, Transmission electron microscopy image (TEM) of the DPPC liposomes (scale bar, 100 nm); **b**, Size distribution histogram of the liposomes shown in panel **a**; cryogenic scanning electron microscopy (**c**) and TEM (**d**) of the interdigitated bilayer sheets made from the DPPC liposomes (**c** scale bar, 2  $\mu\text{m}$ ; **d** scale bar, 100 nm).

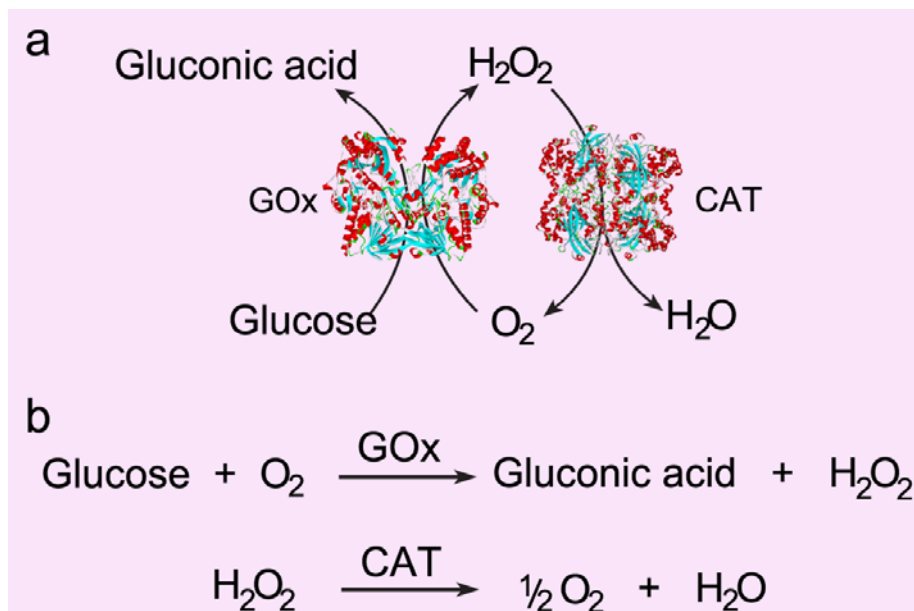

**Supplementary Figure 7** | (a) Schematic illustration and (b) reaction equations of the enzymatic reactions involving glucose oxidation catalyzed by glucose oxidase (GOx) and hydrogen peroxide breakdown by catalase (CAT). The decomposition of the undesired hydrogen peroxide can regenerate oxygen to facilitate glucose oxidation.



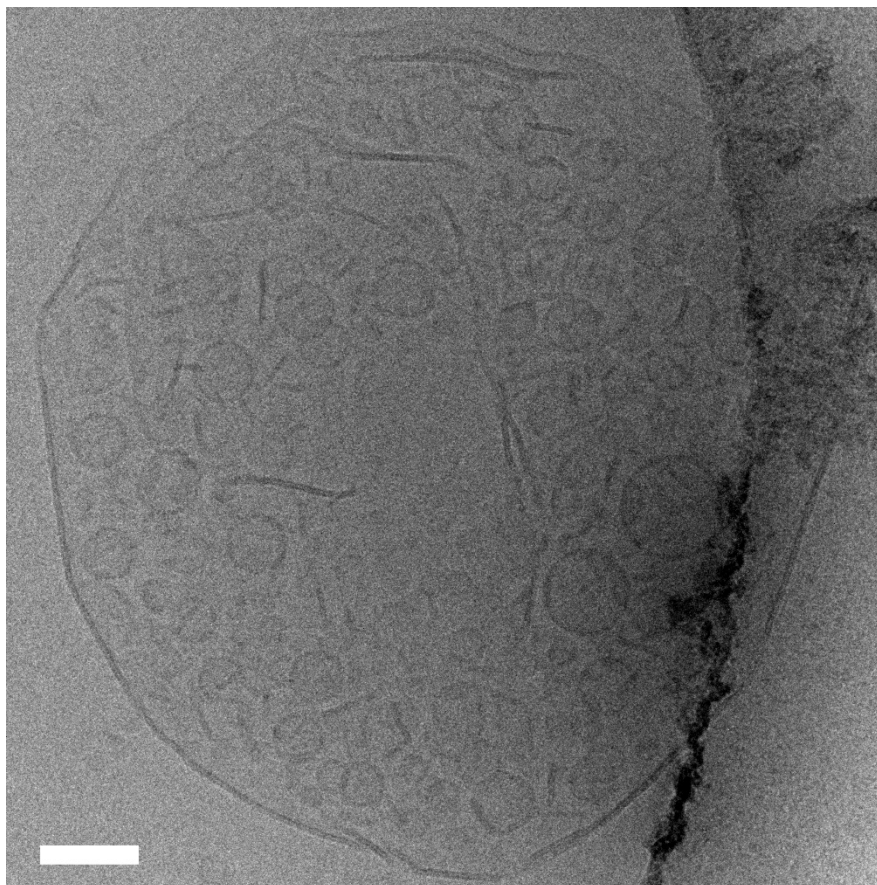

**Supplementary Figure 8** | A representative cryogenic transmission electron microscopy (cryoTEM) image of the final vesicles-in-vesicle superstructures. Scale bar: 100 nm.

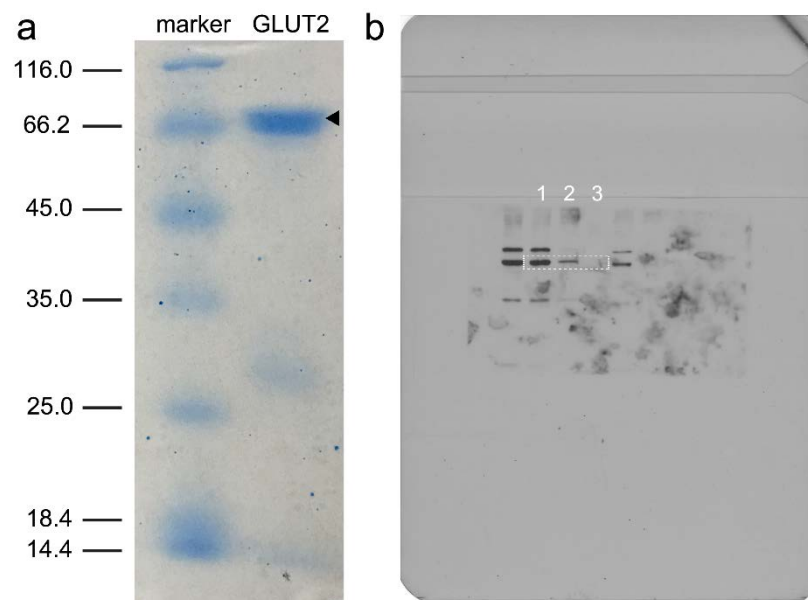

**Supplementary Figure 9** | (a) SDS-PAGE analysis of the purified glucose transporter 2 (GLUT2). (b) Uncropped western blots for Figure 1f. Lanes used for Figure 1f are indicated by a rectangle, where Lane 1, 2 and 3 respectively represent the blots of GLUT2, liposomal superstructures inserted with GLUT2, and pure liposomal superstructures. The lanes on the left side of lane 1 and right side of lane 3 are GLUT2 isolated from different batches of bacteria.

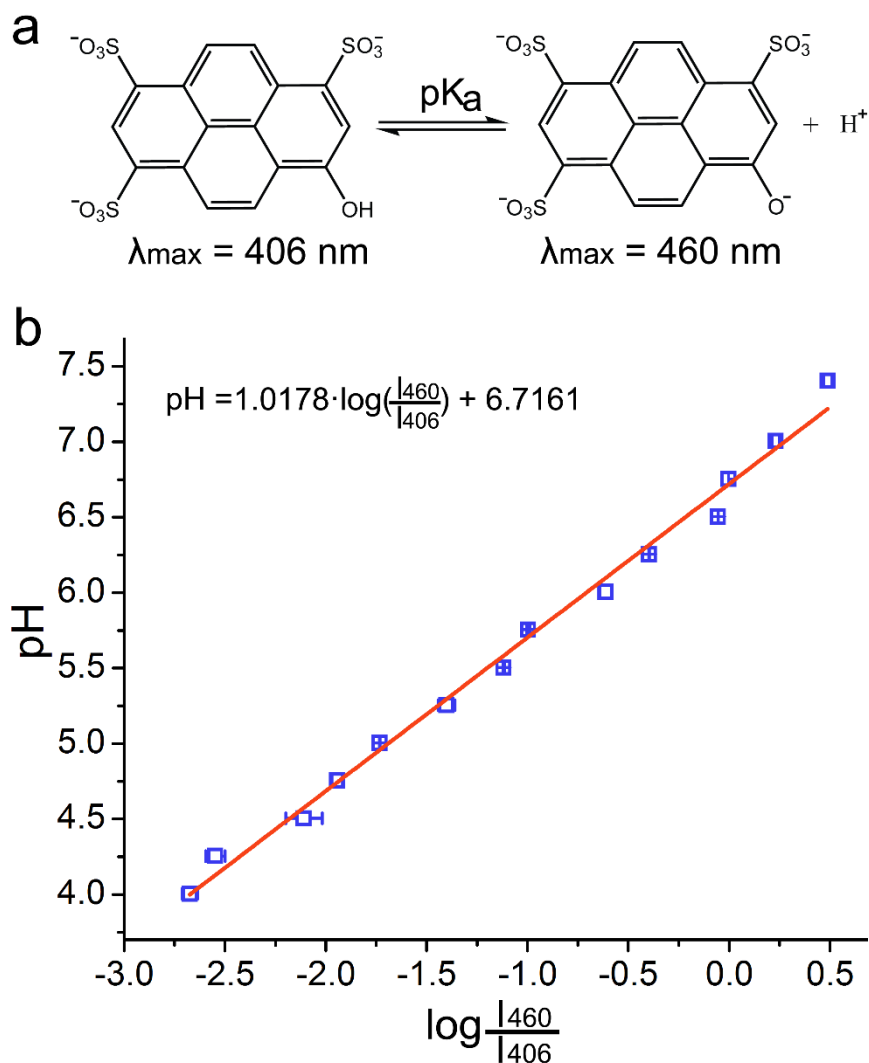

**Supplementary Figure 10| a**, Unionized and ionized forms of HPTS ( $\text{p}K_{\text{a}} = 7.2$ ). **b**, pH titrations of the relative fluorescence intensities of HPTS excited at 406 nm and 460 nm (HEPES buffer, 5 mM, 100 mM NaCl). The fluorescence intensities of HPTS at 514 nm excited by 406 ( $I_{406}$ ) and 460 ( $I_{460}$ ) nm were strongly dependent on the degree of ionization of the 8-hydroxyl group and hence on the medium pH. Data points represent mean  $\pm$  SD (three independent experiments per group;  $n=3$ ).

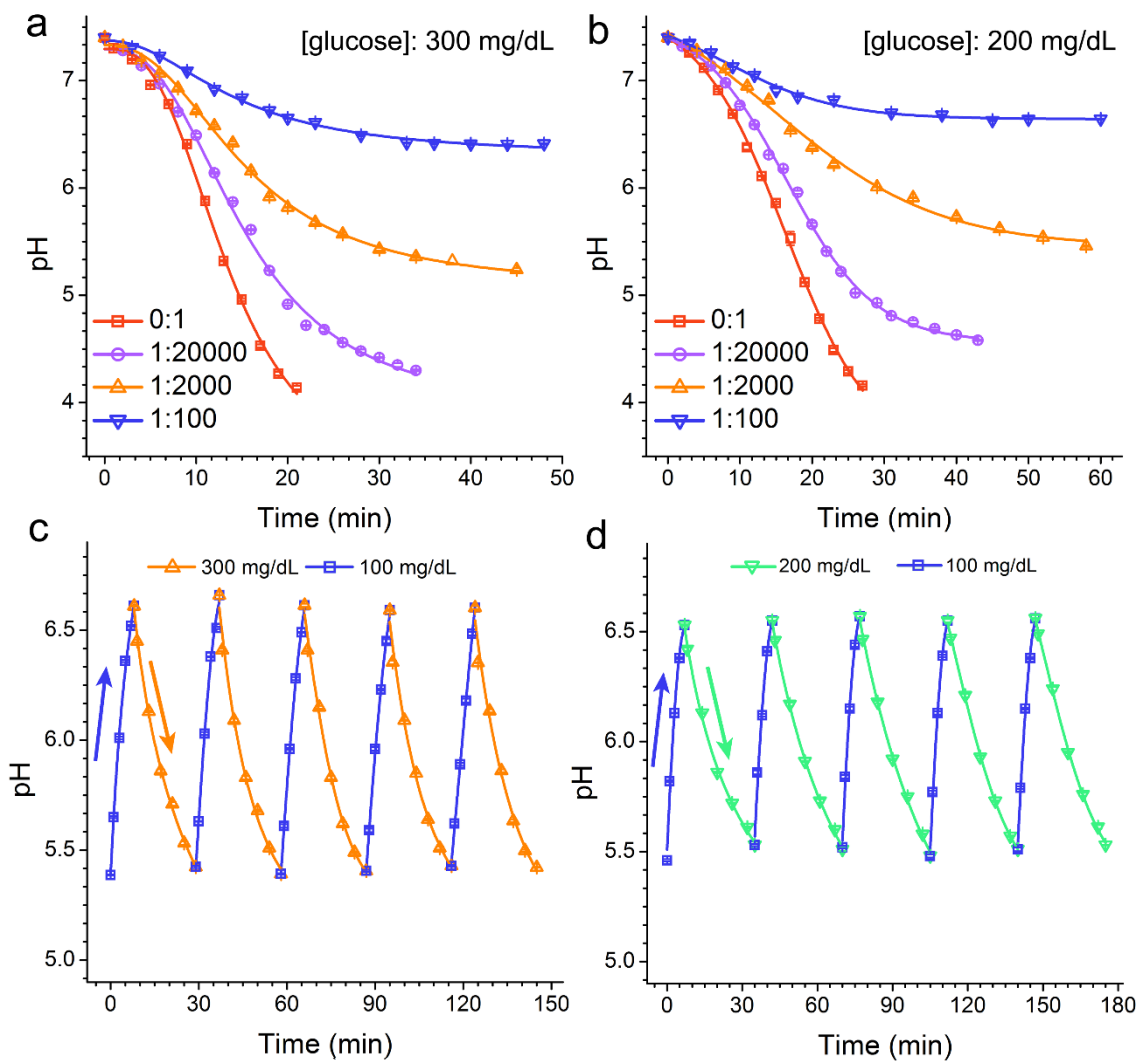

**Supplementary Figure 11** | pH variation inside  $A\beta$ Cs at modest glucose concentrations with different gramicidin insertion in (a) 300 mg/dL and (b) 200 mg/dL glucose solutions. The ratio in the figure label indicates the ratio of gramicidin-to- dipalmitoylphosphatidylcholine lipid. c, d, Reversible pH variation as a result of alternatively switching environmental glucose concentrations. Data points represent mean  $\pm$  SD (three independent experiments per group; n=3).

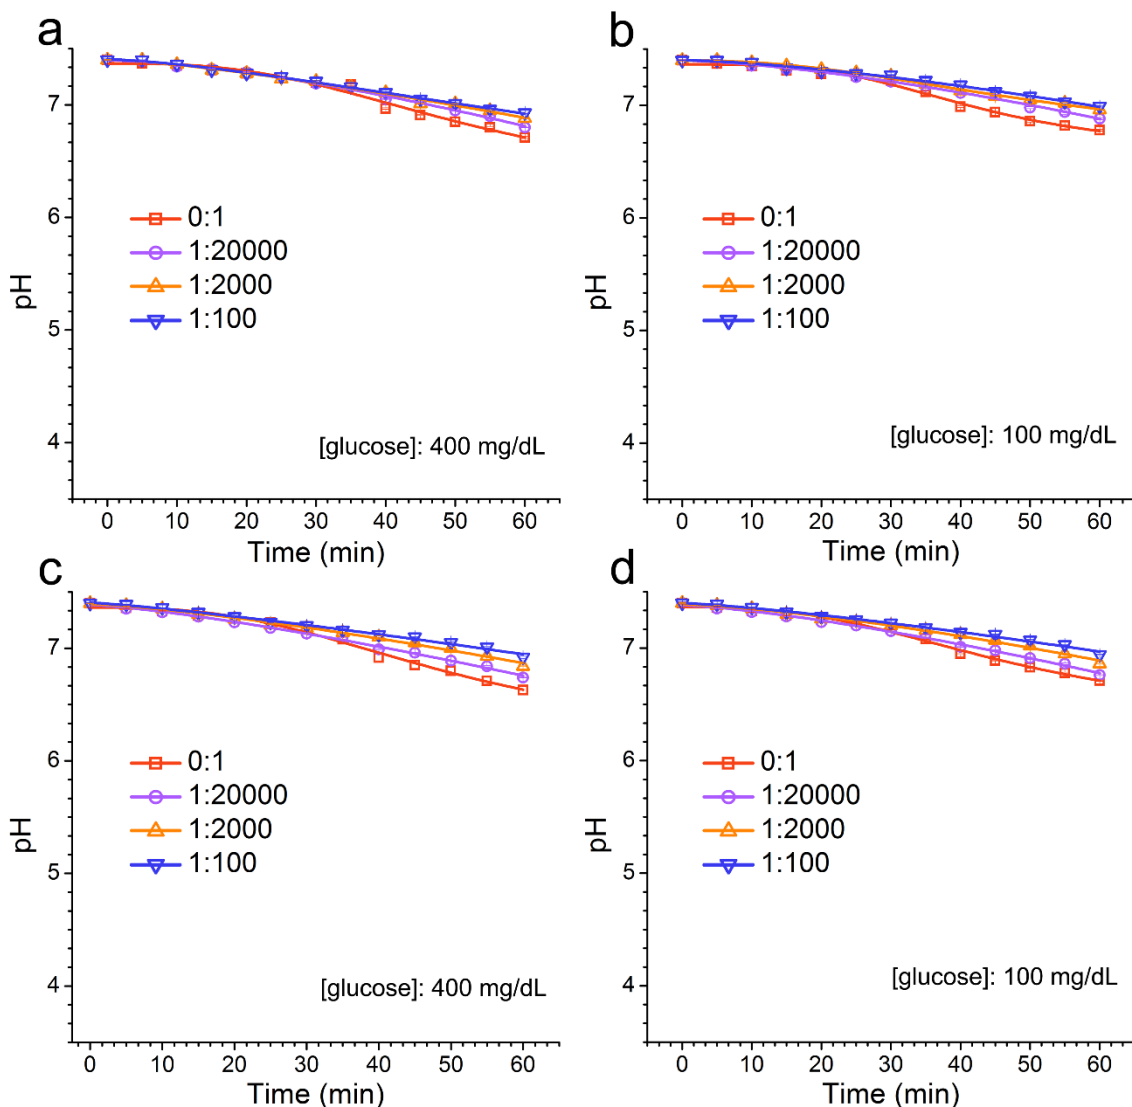

**Supplementary Figure 12** | pH changes inside control  $A\beta$ Cs with no glucose transporter 2 reconstitution in (a) 400 md/dL and (b) 100 mg/dL glucose solutions, and glucose transporter 2 inhibitor-Cytochalasin B pre-treated  $A\beta$ Cs in (c) 400 md/dL and (d) 100 mg/dL glucose solutions. The ratios in the figure represent the molar ratio of the added GA-to-lipid of the outer large liposomal vesicles. In all the control groups, no significant pH variation was observed compared to their counterparts in the experimental group over the same time. The slower decrease in pH might be induced by the passive diffusion of glucose into the control  $A\beta$ Cs. These results indicated that glucose transporter 2 was responsible for the uptake of glucose into  $A\beta$ C, ensued which glucose oxidation induced the pH variation. Data points represent mean  $\pm$  SD (three independent experiments per group; n=3).

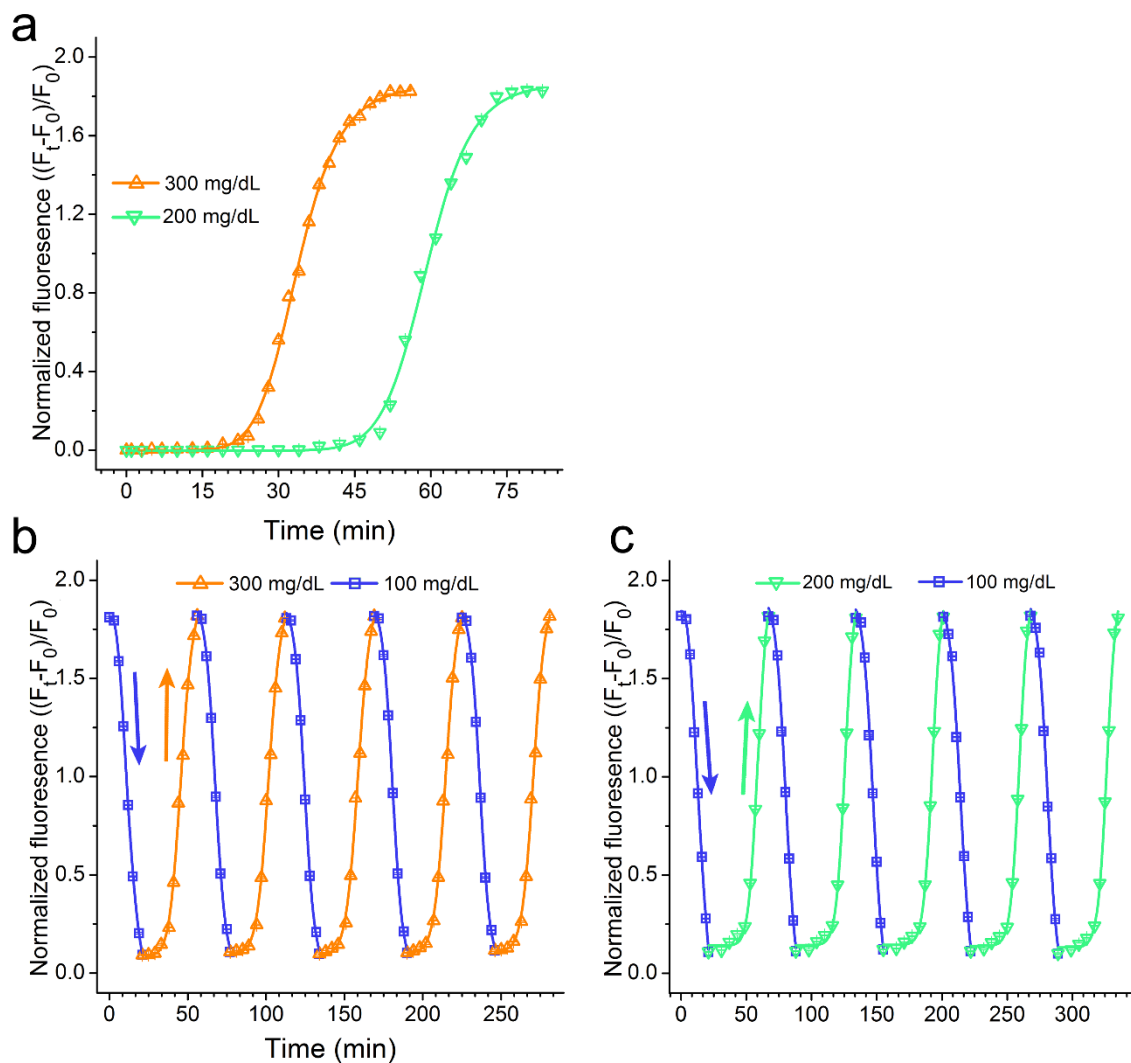

**Supplementary Figure 13| a**, FRET assay to study the dehybridization of the pH-sensitive DNA duplex which bridges the PEG shield and the ISV surface, accompanying the glucose metabolism by  $A\beta$ Cs in 300 mg/mL and 200 mg/mL glucose solutions.  $F_0$  and  $F_t$  represent the fluorescence intensity measured before and at time  $t$  after addition into glucose solutions. **b** and **c**, Reversible quenching and recovery of the fluorescence of DNA-donor to demonstrate the reversible attachment and detachment of the PEG shield at high and low glucose solutions. Data points represent mean  $\pm$  SD (three independent experiments per group;  $n=3$ ).

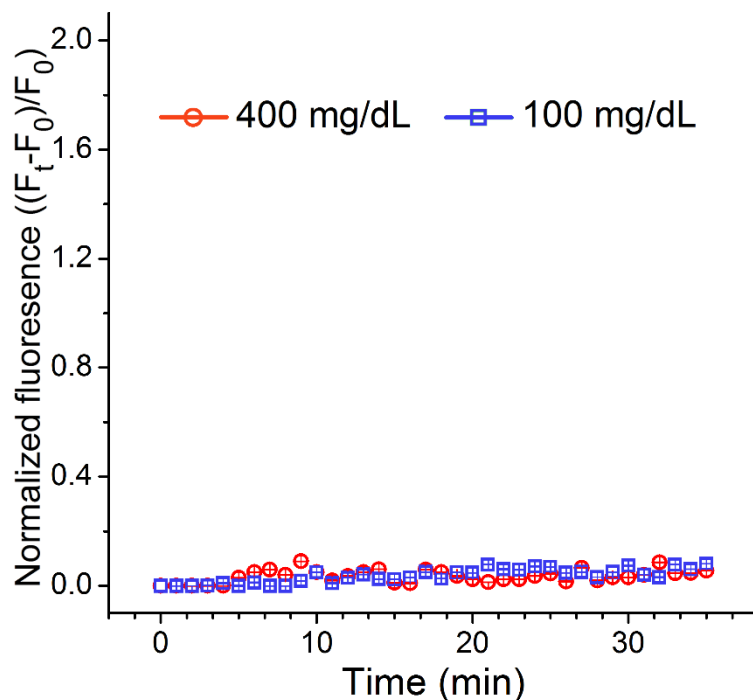

**Supplementary Figure 14** | FRET assay to study the dehybridization of the non-pH-sensitive DNA duplex which bridges the PEG shield and the ISV surface, accompanying the glucose metabolism by  $A\beta$ Cs in 400 mg/mL and 100 mg/mL glucose solutions.  $F_0$  and  $F_t$  represent the fluorescence intensity measured before and at time  $t$  after addition into glucose solutions. The results indicated that no disassociation of the control duplex DNA occurred at either high or low glucose levels due to the lack of pH-sensitive properties. The fluorophore and quencher modification information was shown in the Supplementary Table S1. Data points represent mean  $\pm$  SD (three independent experiments per group;  $n=3$ ).

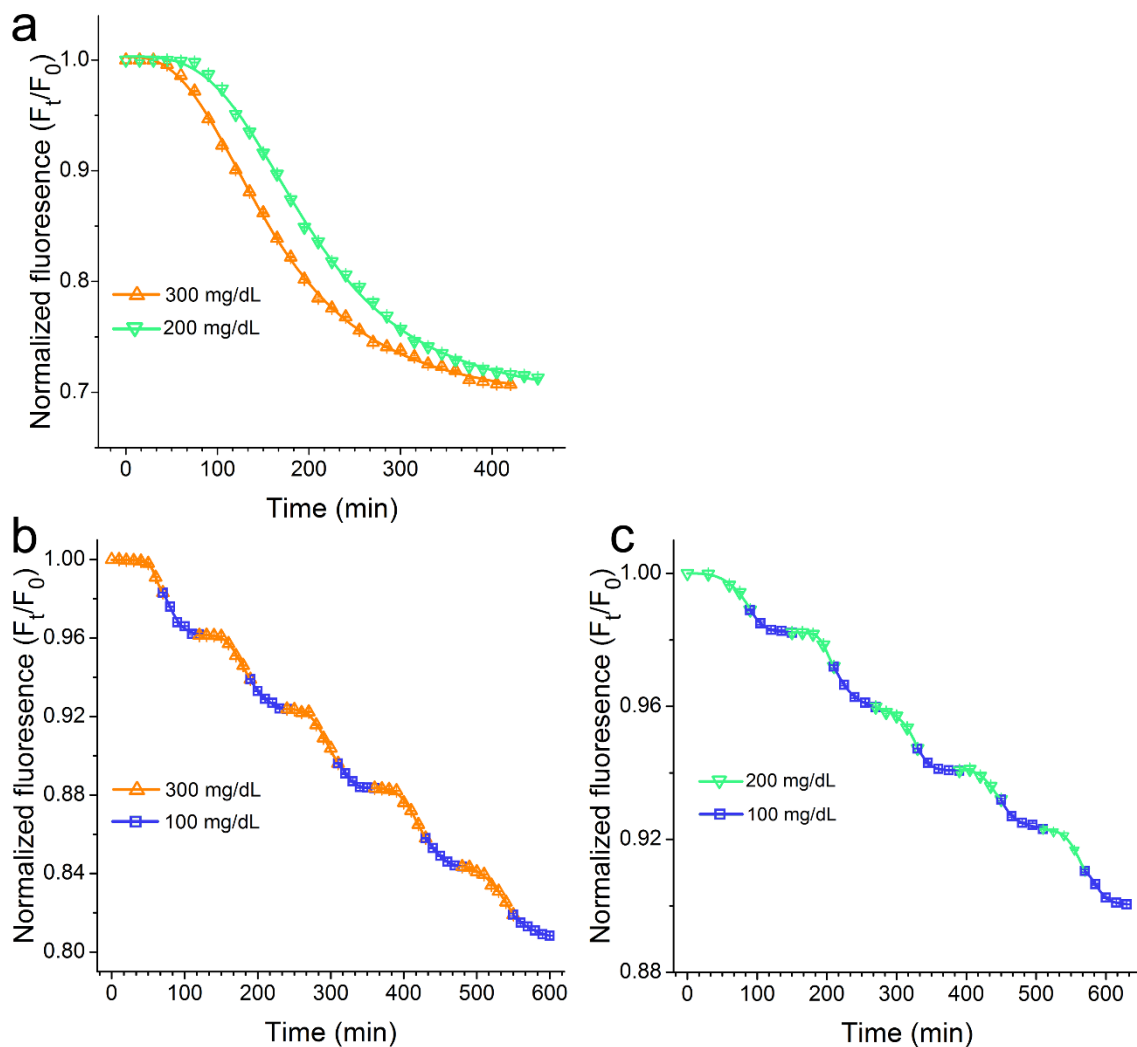

**Supplementary Figure 15** | **a**, FRET assay to study the interactions of peptide-E and peptide-K at modest hyperglycemic concentrations.  $F_0$  and  $F_t$  represent the fluorescence intensity measured before and at time  $t$  after addition into glucose solutions. **b** and **c**, Step decrease in fluorescence intensity of peptide-donor by switching the glucose concentrations. Data points represent mean  $\pm$  SD (three independent experiments per group;  $n=3$ ).



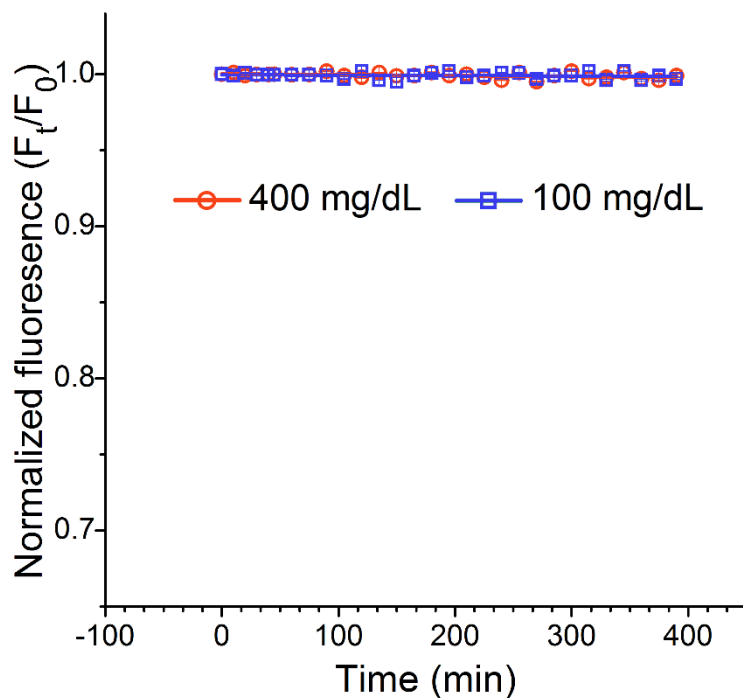

**Supplementary Figure 16** | FRET assay to study the interactions of the peptide anchored on OLVs and ISVs surfaces at different glucose concentrations, where the ISVs were modified with non-pH-responsive DNA bridged PEG shield, and peptide-K and peptide-E were modified nitrobenzofuran (peptide-donor) and tetramethylrhodamine (peptide-acceptor), respectively.  $F_0$  and  $F_t$  represent the fluorescence intensity of peptide-donor measured before and at time  $t$  after addition into glucose solutions. The data indicated that by using non-pH-controllable PEG shield, the peptide-K on the ISV surfaces were hindered to interact with the peptide-E on OLV inner surfaces. Data points represent mean  $\pm$  SD (three independent experiments per group;  $n=3$ ).

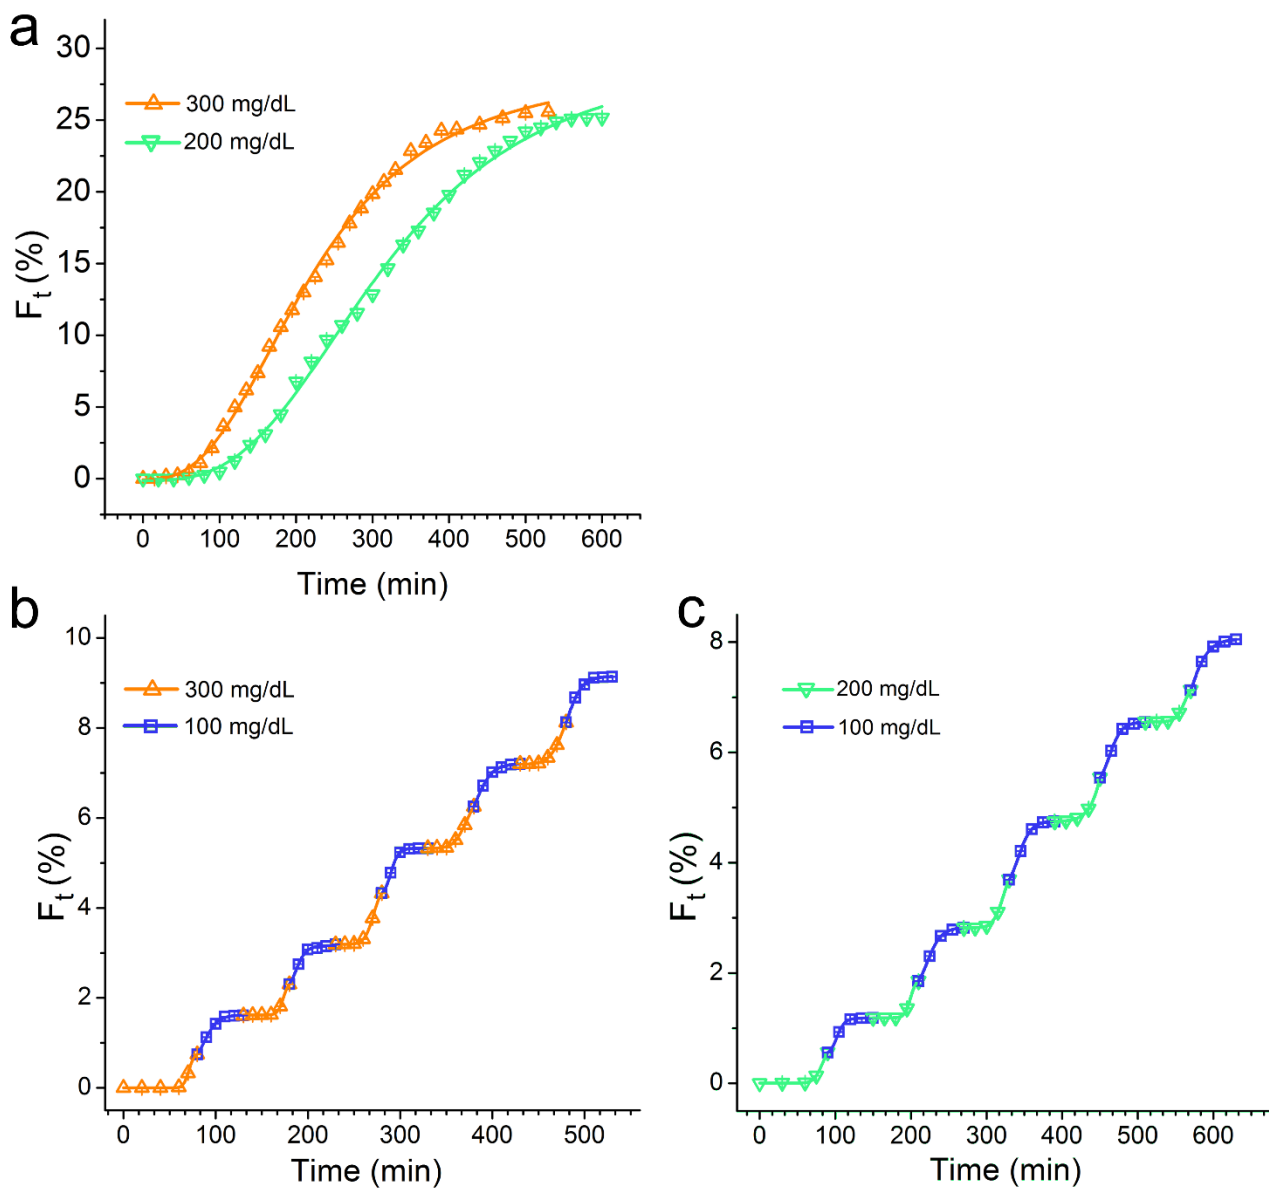

**Supplementary Figure 17| a**, Kinetics profiles of lipid mixing between lipid-donor/acceptor-labeled ISV and OLV in 300 mg/dL and 200 mg/dL glucose solutions as indicated by the increase in lipid-donor emission. **b** and **c**, Step increase in the fluorescence of lipid-donor after alternatively changing the glucose concentrations. Data points represent mean  $\pm$  SD (three independent experiments per group;  $n=3$ ).

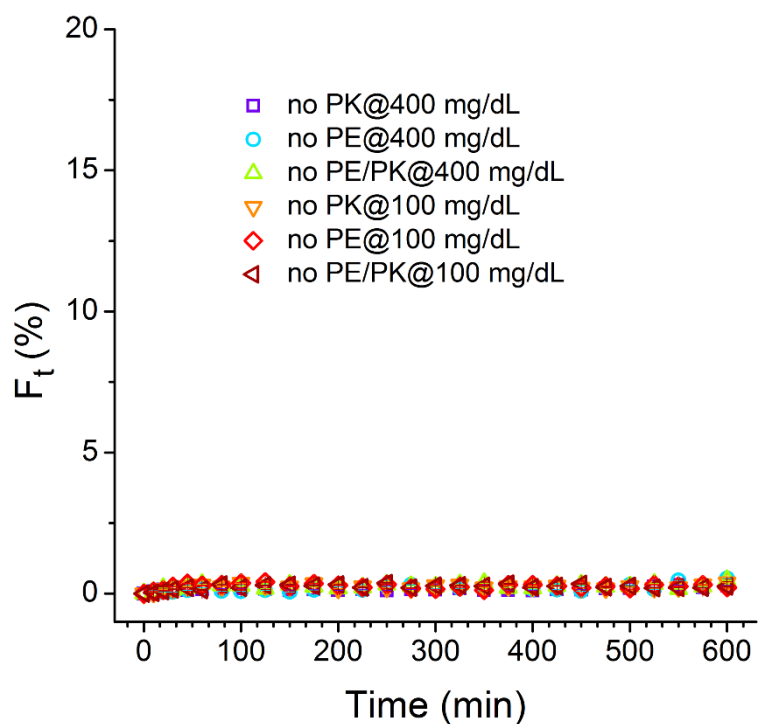

**Supplementary Figure 18** Lipid mixing between ISV and OLV as indicated by the variation in NBD fluorescence in control  $A\beta$ Cs in which peptide-K (PK), or peptide-E (PE), or peptide-E and peptide-K (PE/PK) were omitted. It can be seen that lacking the machinery for membrane fusion, no lipid mixing was detected at either high or low glucose concentrations. Data points represent mean  $\pm$  SD (three independent experiments per group;  $n=3$ ).

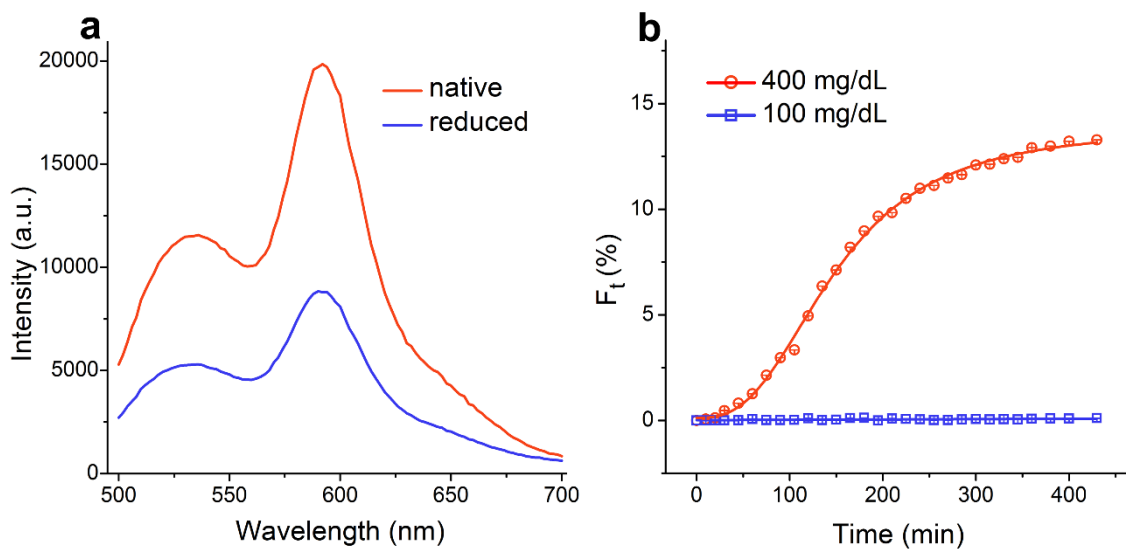

**Supplementary Figure 19** **a**, Fluorescence spectra of lipid-donor/lipid-acceptor co-labeled ISV before (red line) and after (green line) reduction by sodium dithionate. **b**, Kinetics profiles showed the mixing of the inner-layer lipids of lipid-donor/lipid-acceptor co-labeled ISV with OLV in 400 mg/dL and 100 mg/dl glucose solutions as indicated by the increase in lipid-donor emission. Data points represent mean  $\pm$  SD (three independent experiments per group;  $n=3$ ).

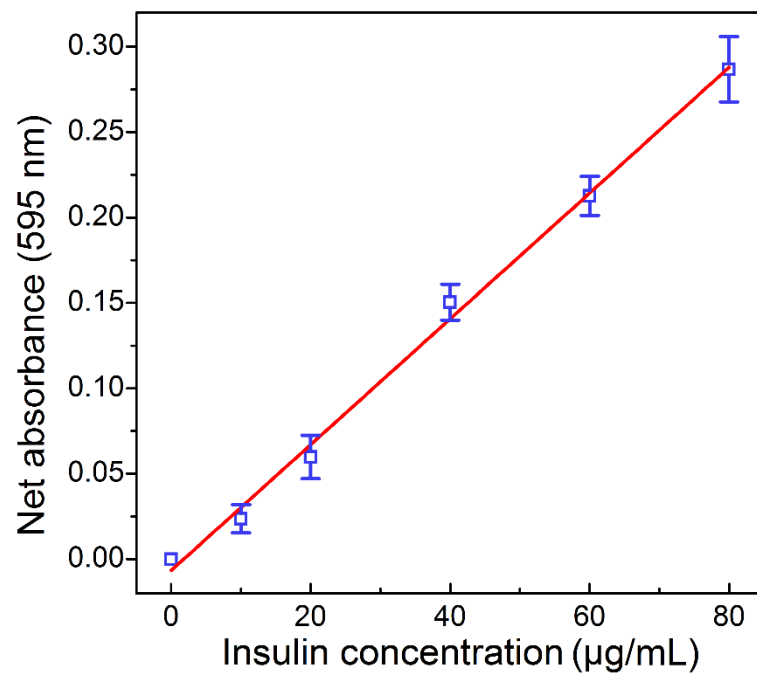

**Supplementary Figure 20** Insulin standard curve obtained by Coomassie Plus protein assay. Data points represent mean  $\pm$  SD (three independent experiments per group; n=3).

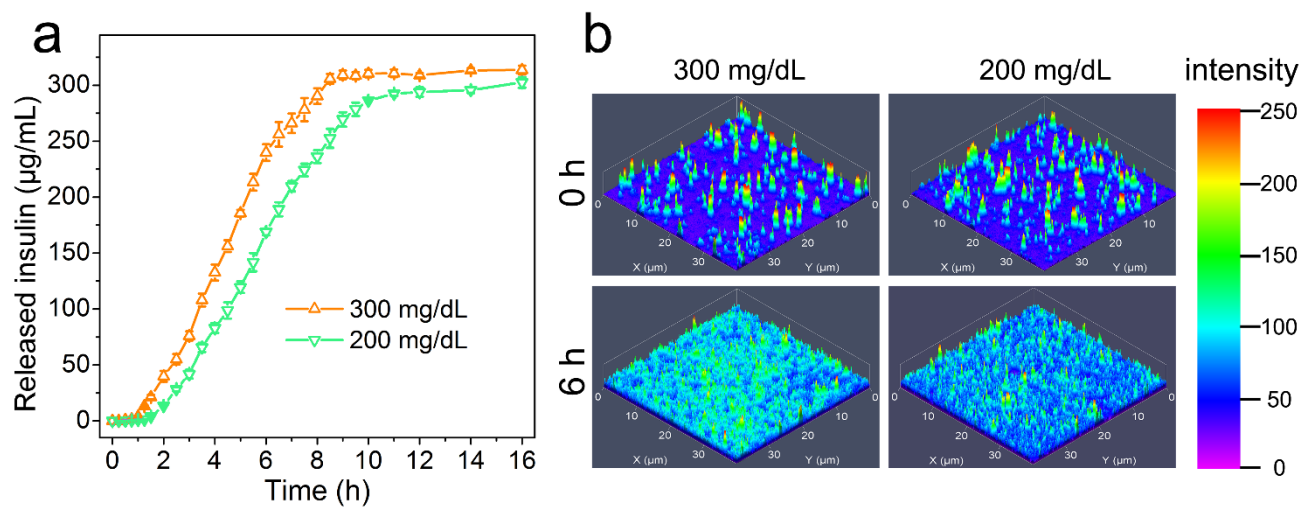

**Supplementary Figure 21| a**, *In vitro* accumulated insulin release from  $A\beta$ Cs incubated in solutions with modest hyperglycemic concentrations. Data points represent mean  $\pm$  SD (three independent experiments per group; n=3). **b**, 2.5D confocal laser microscopy images showed the fluorescence intensity and distribution of fluorescein labeled-insulin from  $A\beta$ Cs before and after incubation in solutions containing different concentrations of glucose.

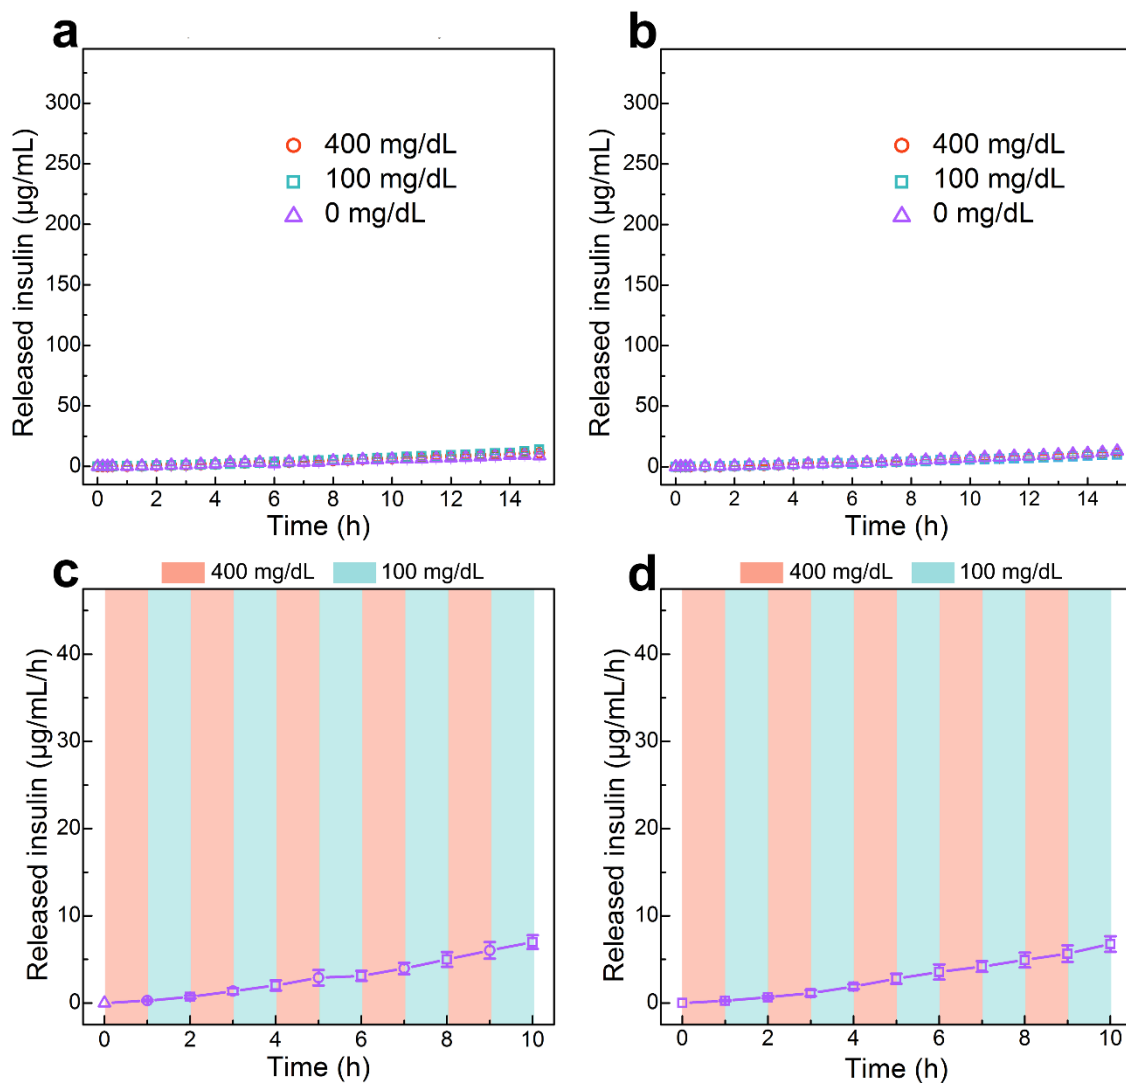

**Supplementary Figure 22** | *In vitro* accumulated insulin release from control  $A\beta$ Cs (**a**) lacking glucose sensing machinery (glucose transporter 2, glucose oxidase/catalase, and gramicidin) and (**b**) with no membrane fusion machinery (peptide-E and peptide-K) at different glucose levels. **c** and **d** respectively showed the rate of the pulsatile insulin release profile by the control  $A\beta$ Cs used in **a** and **b** in response to glucose concentration switch between 400 and 100 mg/dL. Data points represent mean  $\pm$  SD (three independent experiments per group;  $n=3$ ).

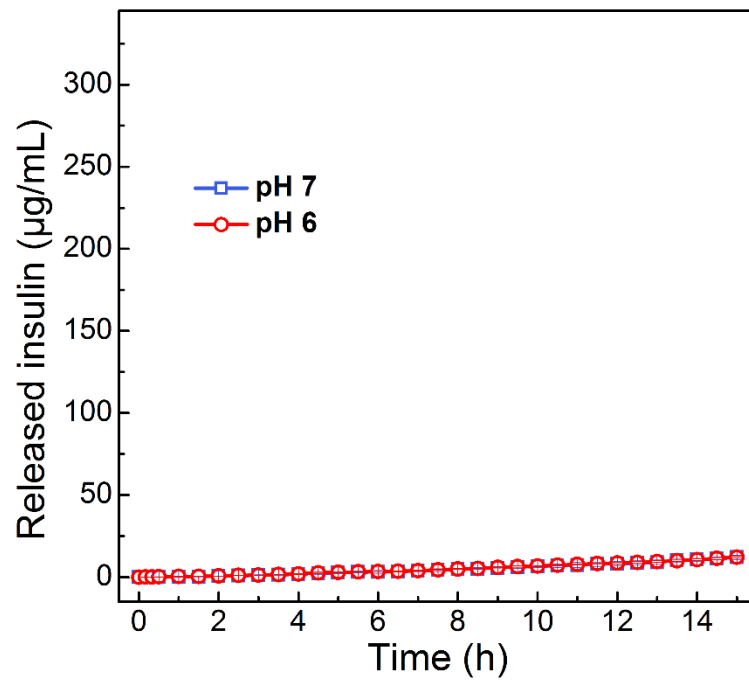

**Supplementary Figure 23** | *In vitro* accumulated insulin release from A $\beta$ Cs in mild acidic environment. Data points represent mean  $\pm$  SD (three independent experiments per group; n=3).



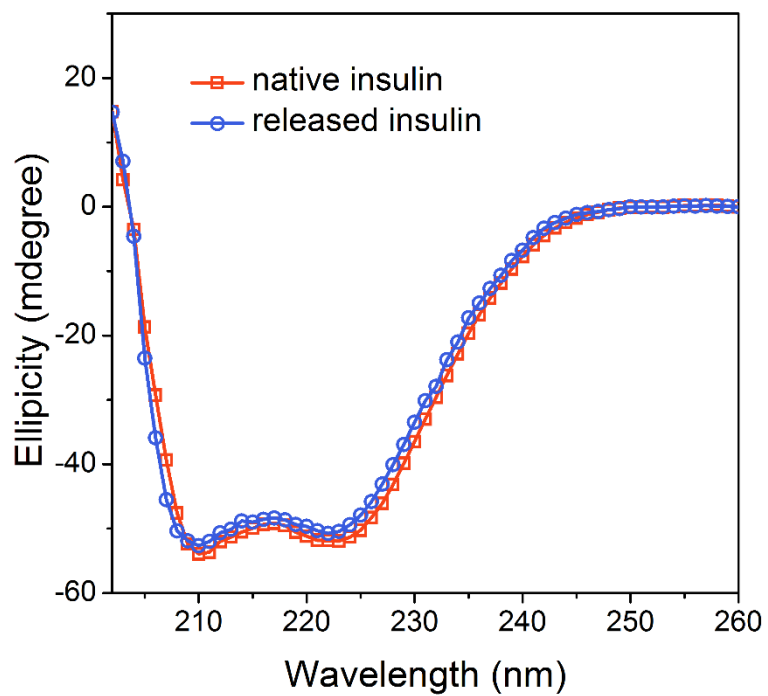

**Supplementary Figure 24** | CD spectra of the solutions containing native insulins, and released insulins from  $A\beta$ Cs incubated with 400 mg/dL glucose. The data indicated that the overall secondary structure of the released insulins was maintained to that of the native insulins.

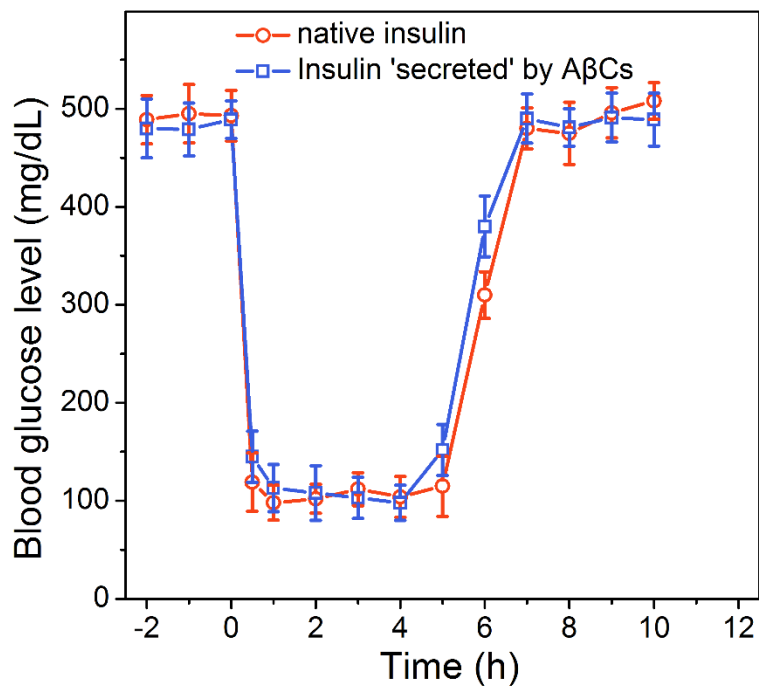

**Supplementary Figure 25** | Comparison the bioactivity of the insulin 'secreted' by AβCs after incubation with 400 mg/dL glucose and that of native insulin. The results showed that the bioactivity of insulin was highly retained during the AβC preparation and release test. Data points represent mean ± SD (five mice per group; n=5).

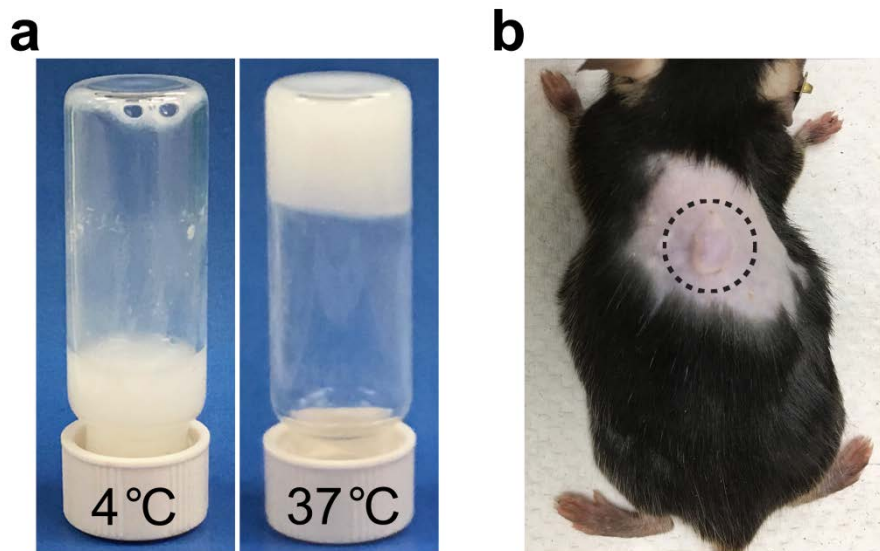

**Supplementary Figure 26** |  $A\beta C$  integrated thermoresponsive PF127 (40 wt%) solution immediately formed a hydrogel at 37 °C *in vitro* (a), and 1 min after subcutaneously injection (b). As can be clearly seen in b, the hydrogel presented as a 'bump' on the dorsum of the mouse.

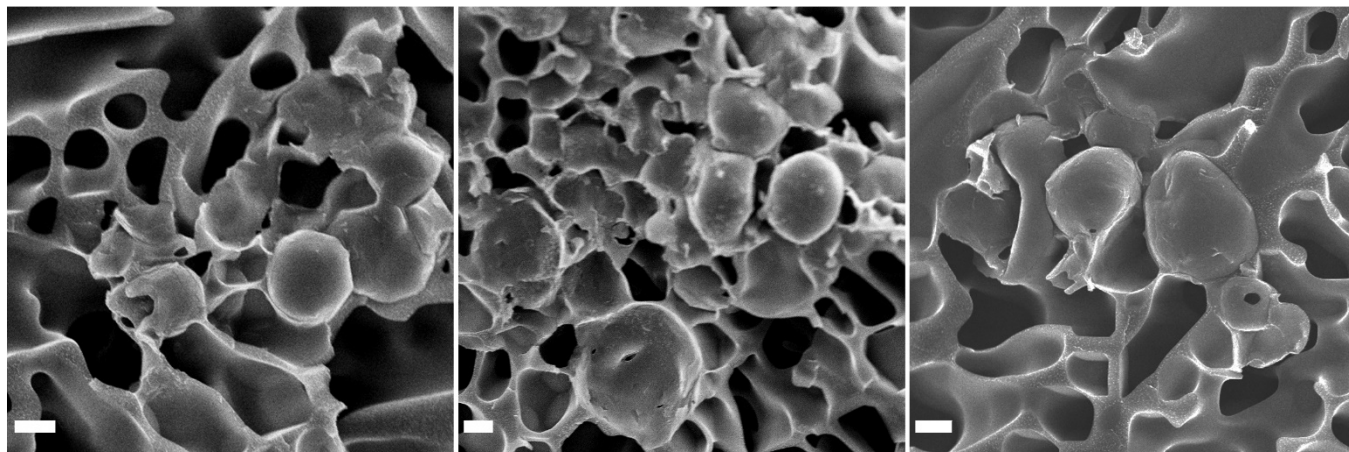

**Supplementary Figure 27** | Representative cryogenic scanning electron microscopy (cryoSEM) images of the A $\beta$ C integrated thermoresponsive PF127 solution shown in Supplementary Figure 26. Scale bars: 1  $\mu$ m.

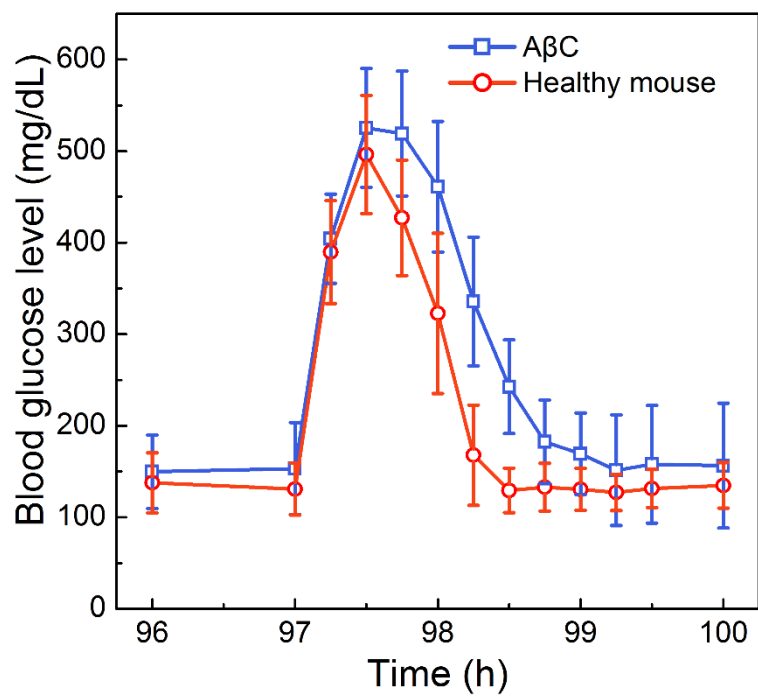

**Supplementary Figure 28** | *In vivo* intraperitoneal glucose tolerance test (IPGTT) performed toward diabetic mice on day five following  $A\beta C$  treatment in comparison to the healthy control mice. Data points represent mean  $\pm$  SD (five mice per group;  $n=5$ ).

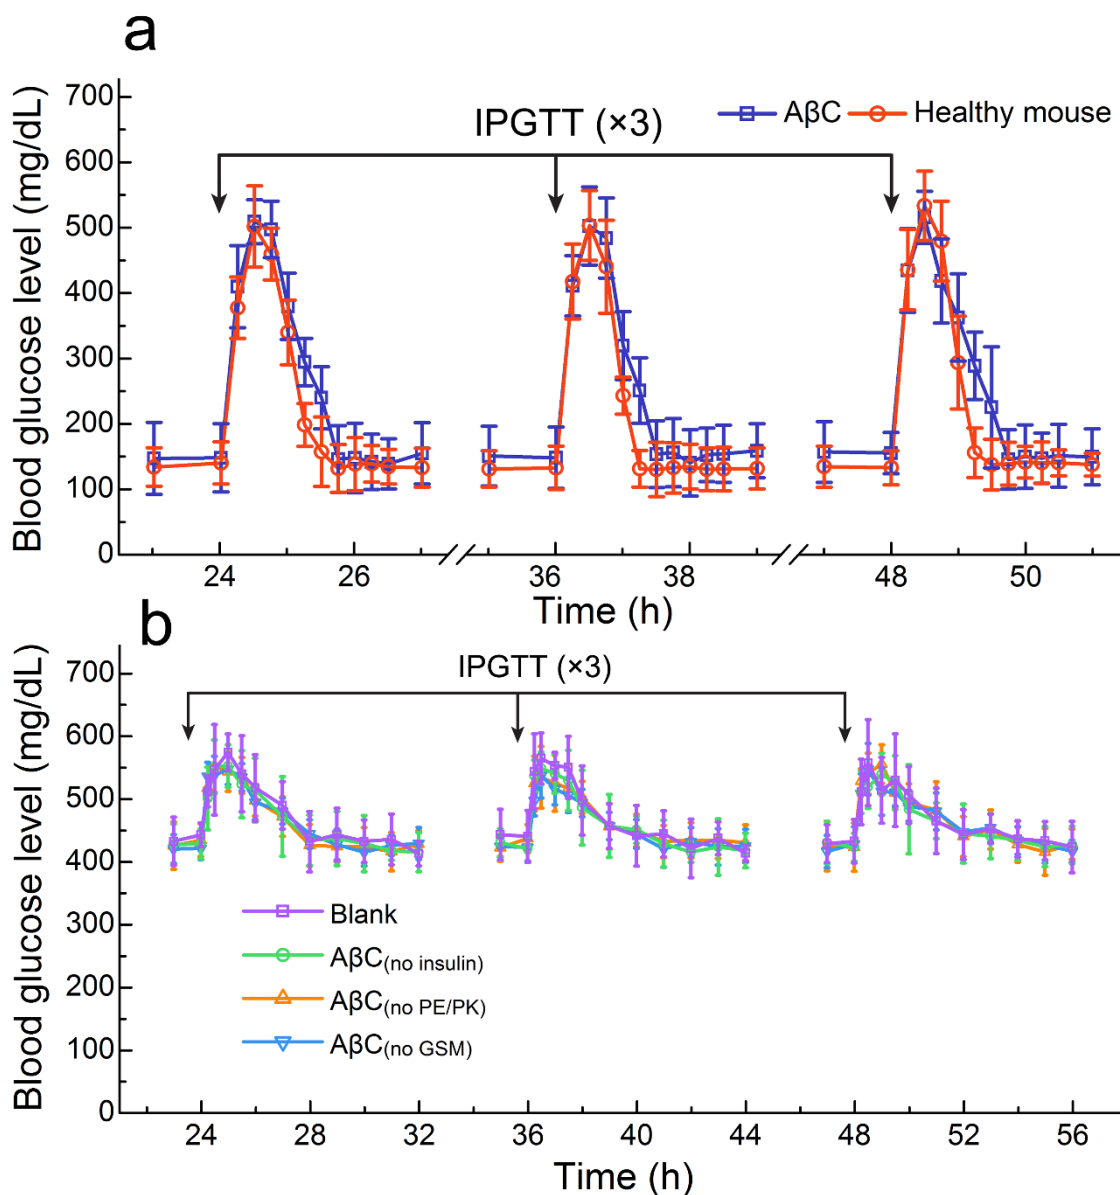

**Supplementary Figure 29** (a) *In vivo* intraperitoneal glucose tolerance test (IPGTT) performed toward diabetic mice at 24, 36, and 48 h following AβC treatment in comparison to the healthy control mice. Data points represent mean ± SD (five mice per group; n=5). (b) IPGTT performed toward diabetic mice at 24, 36, and 48 h following treatment with PBS (Blank) and control AβCs. The remained high blood glucose levels in the control groups as well as the insignificant difference in blood glucose variation between PBS-treated and control AβC-treated groups demonstrated the lack of responsiveness of the control AβCs. Data points represent mean ± SD (five mice per group; n=5).

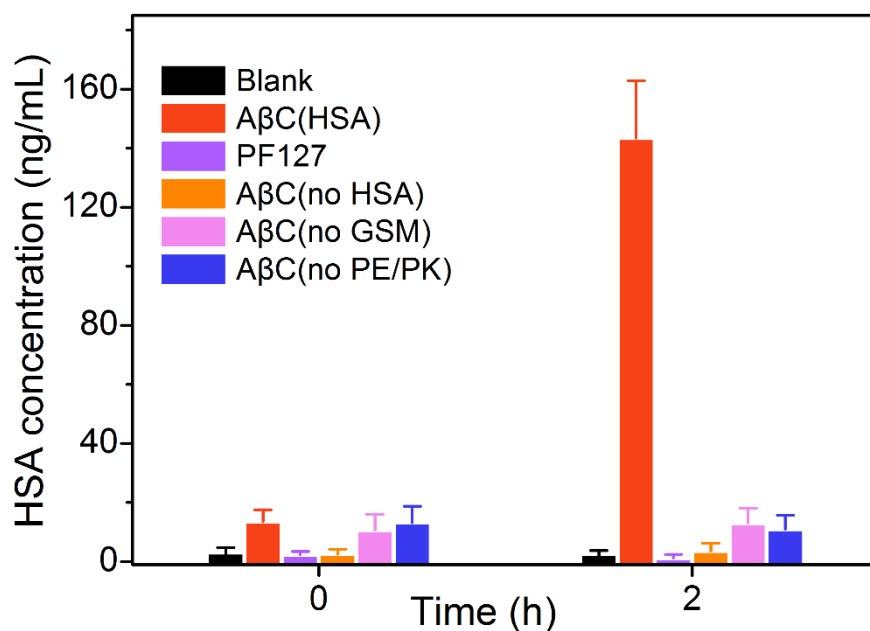

**Supplementary Figure 30** | *In vivo* intraperitoneal glucose tolerance test (IPGTT) performed towards wild-type mice transplanted with AβCs that were loaded with human serum albumin (HSA) as a reporter protein. The human serum albumin in the serum of each group were measured by ELISA at 2 h after intraperitoneal injection of 50 mg glucose/mouse. Data points represent mean ± SD (five mice per group; n=5).

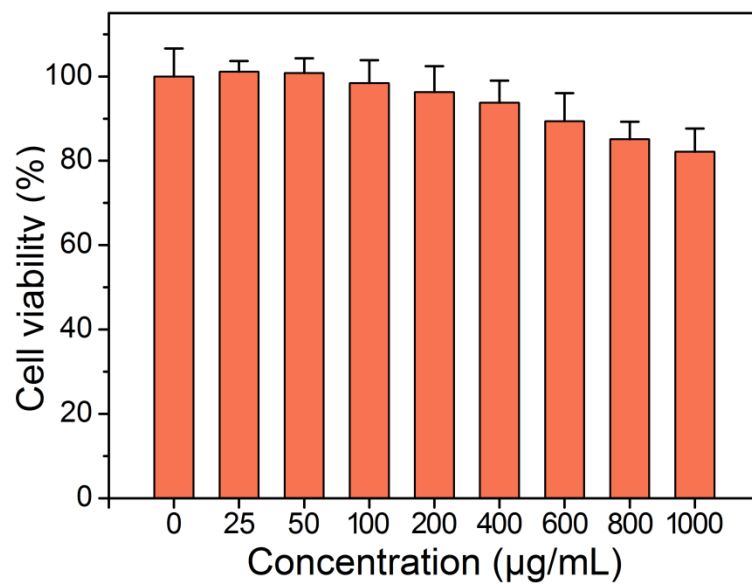

**Supplementary Figure 31** | Cytotoxicity assay of insulin-free AβC toward HeLa cells after 24 h incubation. Data points represent mean ± SD (three independent experiments per group; n=3).



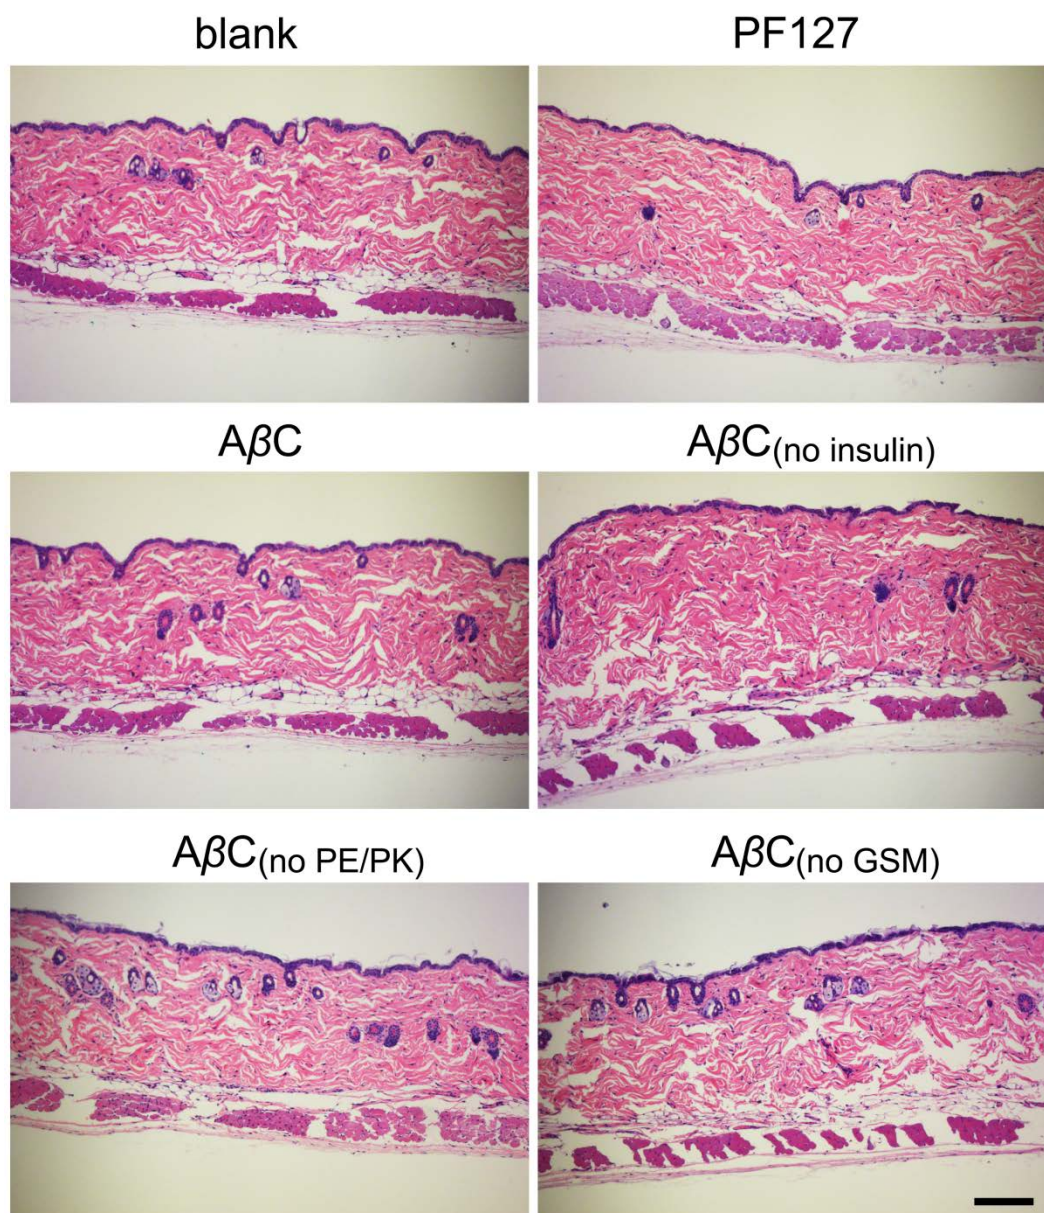

**Supplementary Figure 32** | Hematoxylin and eosin-stained sections of subcutaneously injected with PBS solution (blank), PF127 thermogel, or ‘transplanted’ with  $A\beta C$ ,  $A\beta C_{(no\ insulin)}$ ,  $A\beta C_{(no\ PE/PK)}$ , or  $A\beta C_{(no\ GSM)}$  after four weeks, respectively. From the graph it can be seen that all the components were degraded and no noticeable inflammatory region or fibrotic encapsulation was observed, indicating the biocompatibility of the artificial assemblies. Scale bar: 150  $\mu m$ .

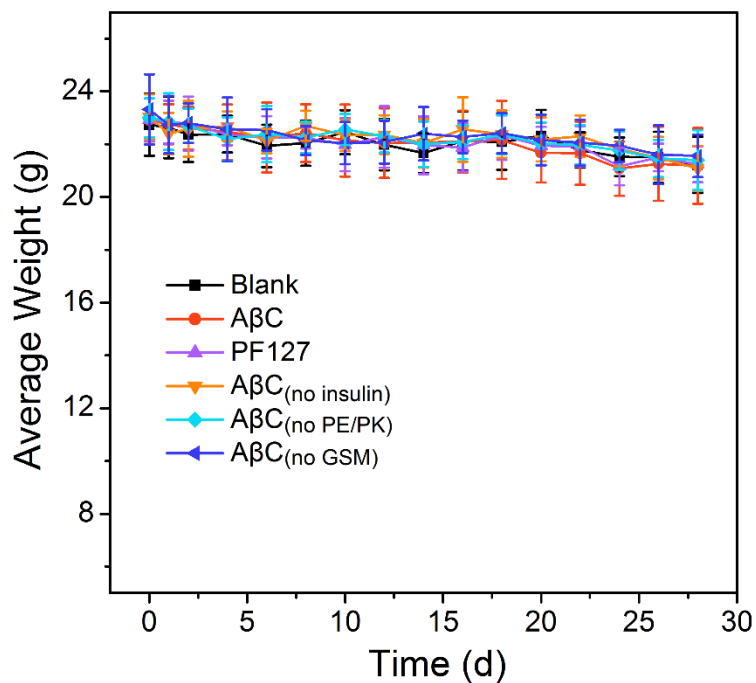

**Supplementary Figure 33** | Average body weight of the diabetes mice after injection with PBS solution (blank), PF127 thermogel, or ‘transplanted’ with  $A\beta C$ ,  $A\beta C_{(no\ insulin)}$ ,  $A\beta C_{(no\ PE/PK)}$ , or  $A\beta C_{(no\ GSM)}$  for four weeks, respectively. Data points represent mean  $\pm$  SD (five mice per group;  $n=5$ ).

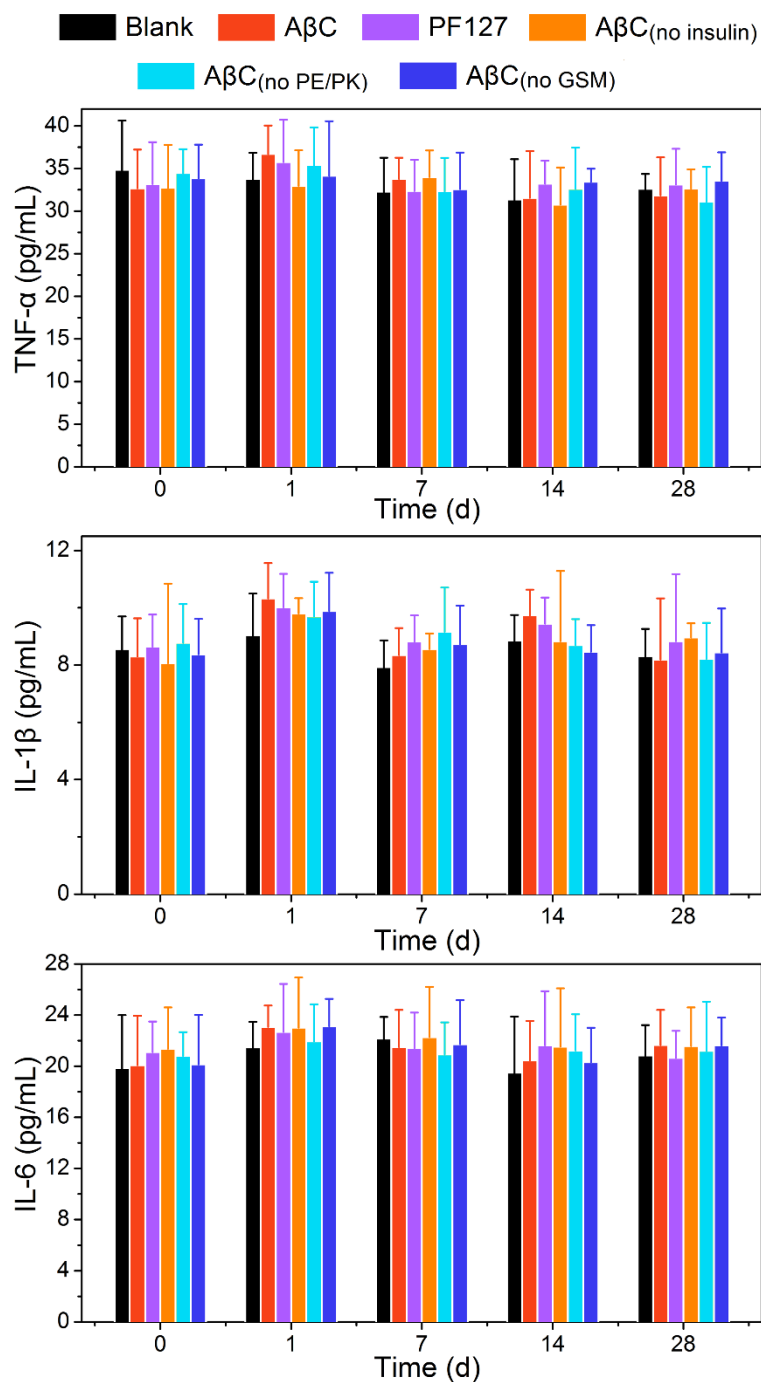

**Supplementary Figure 34** | Serum levels of TNF- $\alpha$ , IL-1 $\beta$  and IL-6 in diabetes mice after injection with PBS solution (blank), PF127 thermogel, or ‘transplanted’ with A $\beta$ C, A $\beta$ C<sub>(no insulin)</sub>, A $\beta$ C<sub>(no PE/PK)</sub>, or A $\beta$ C<sub>(no GSM)</sub>, respectively. Data points represent mean  $\pm$  SD (five mice per group; n=5).

## Supplementary Table:

**Supplementary Table 1.** The DNA sequences used for synthesis of PEG shield.

|                       |                    |                                                        |
|-----------------------|--------------------|--------------------------------------------------------|
| pH-responsive DNA     | CDNA               | 5'-CCC TTA CCC TTA CCC TTA CCC TTT TTT-SH-3'           |
|                       | TAMRA-labeled CDNA | 5'-CCC TAA CCC TAA CCC TAA CCC T/i5-TAMK/T TTT T-SH-3' |
|                       | *GDNA              | 5'-GGG TTA GGG TTA GGG TTA GGG TTT TTT-CH-3'           |
|                       | IAbRQ-labeled GDNA | 5'-IAbRQ-GGG TTA GGG TTA GGG TTA GGG TTT TTT-CH-3'     |
| Non-pH-responsive DNA | DNA1               | 5'-CTC TCA CAC TCA CTC TCA CGC TTT TTT-SH-3'           |
|                       | TAMRA-labeled DNA1 | 5'-CTC TCA CAC TCA CTC TCA CGC T/i5-TAMK/TT TTT-SH-3'  |
|                       | DNA2               | 5'-GCG TGA GAG TGA GTG TGA GAG TTT TTT-CH-3'           |
|                       | IAbRQ-labeled DNA2 | 5'-IAbRQ-GCG TGA GAG TGA GTG TGA GAG TTT TTT-CH-3'     |

\*The three mismatch bases at the partial complementary region of CDNA and GDNA could accelerate the conformational transition process at mildly acidic pH.<sup>39</sup>

**Supplementary Movie 1** | A movie showing the liposomes-in-liposome superstructures. The inner small liposomes were incorporated with lipids labelled with nitrobenzofuran and outer larger liposome was incorporated with lipids labeled with lissamine rhodamine B. It can be seen that the small particles were moving randomly by Brownian motion inside the large liposomes.

**Supplementary Note 1** | Plasmid map and full plasmid sequence for glucose transporter 2 (GLUT2).

**Supplementary Note 1** | Plasmid map and full plasmid sequence for glucose transporter 2 (GLUT2). **GLUT2 sequence is highlighted in red** and pET28a plasmid backbone sequence in black.

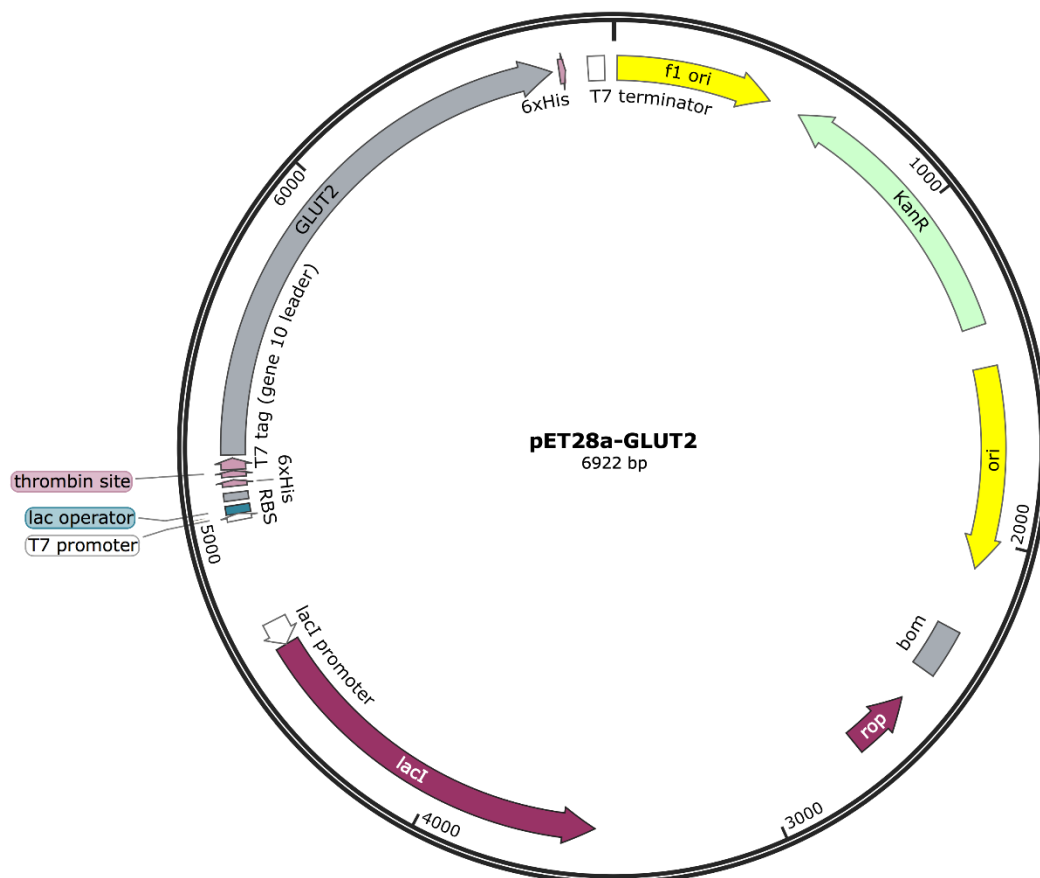

TGGCGAATGGGACGCGCCCTGTAGCGGCGCATTAAAGCGCGGGCGGGTGTGGTGGTT  
 ACGCGCAGCGTGACCGCTACACTTGCCAGCGCCCTAGCGCCCCTCCTTTCGCTTT  
 CTTCCTTCCTTCTCGCCACGTTTCGCCGGCTTTCCTCCGTC AAGCTCTAAATCGGG  
 GGCTCCCTTTAGGGTTCCGATTTAGTGCTTTACGGCACCTCGACCCCAAAAACTT  
 GATTAGGGTGATGGTTCACGTAGTGGGCCATCGCCCTGATAGACGGTTTTTCGCC  
 TTTGACGTTGGAGTCCACGTTCTTTAATAGTGGACTCTTGTTC CAAACTGGAACAA  
 CACTCAACCCTATCTCGGTCTATTCTTTTGATTTATAAGGGATTTTGCCGATTTCCGC  
 CTATTGGTTAAAAAATGAGCTGATTTAACAAAAATTTAACGCGAATTTTAACAAAAT  
 ATTAACGTTTACAATTT CAGGTGGCACTTTTCGGGGAAATGTGCGCGGAACCCCTA  
 TTTGTTTATTTTCTAAATACATTCAAATATGTATCCGCTCATGAATTAATTCTTAGAA  
 AAACTCATCGAGCATCAAATGAAACTGCAATTTATTCATATCAGGATTATCAATACC  
 ATATTTTGA AAAAGCCGTTTCTGTAATGAAGGAGAAAACTCACCGAGGCAGTTCC  
 ATAGGATGGCAAGATCCTGGTATCGGTCTGCGATTCCGACTCGTCCAACATCAATA  
 CAACCTATTAATTTCCCTCGTCAAAAATAAGGTTATCAAGTGAGAAATCACCATG

AGTGACGACTGAATCCGGTGAGAATGGCAAAAGTTTATGCATTTCTTTCCAGACTT  
GTTCAACAGGCCAGCCATTACGCTCGTCATCAAATCACTCGCATCAACCAAACCG  
TTATTCATTTCGTGATTGCGCCTGAGCGAGACGAAATACGCGATCGCTGTTAAAAGG  
ACAATTACAAACAGGAATCGAATGCAACCGGCGCAGGAACACTGCCAGCGCATCA  
ACAATATTTTACCTGAATCAGGATATTCTTCTAATACCTGGAATGCTGTTTTCCCGG  
GGATCGCAGTGGTGAGTAACCATGCATCATCAGGAGTACGGATAAAATGCTTGATG  
GTCGGAAGAGGCATAAATTCCGTCAGCCAGTTTAGTCTGACCATCTCATCTGTAAC  
ATCATTGGCAACGCTACCTTTGCCATGTTTCAGAAACAACCTCTGGCGCATCGGGCT  
TCCATAACAATCGATAGATTGTGCGACCTGATTGCCCGACATTATCGCGAGCCCATT  
TATACCCATATAAATCAGCATCCATGTTGGAATTTAATCGCGGCCTAGAGCAAGACG  
TTTTCCCGTTGAATATGGCTCATAACACCCCTTGTATTACTGTTTATGTAAGCAGACA  
GTTTTATTGTTTCATGACCAAAATCCCTTAACGTGAGTTTTTCGTTCCACTGAGCGTCA  
GACCCCGTAGAAAAGATCAAAGGATCTTCTTGAGATCCTTTTTTTTCTGCGCGTAAT  
CTGCTGCTTGCAAACAAAAAACCACCGCTACCAGCGGTGGTTTGTGTTGCCGGAT  
CAAGAGCTACCAACTCTTTTTCCGAAGGTAACCTGGCTTCAGCAGAGCGCAGATAC  
CAAATACTGTCTTCTAGTGTAGCCGTAGTTAGGCCACCACTTCAAGAACTCTGTA  
GCACCGCCTACATACCTCGCTCTGCTAATCCTGTTACCAGTGGCTGCTGCCAGTGG  
CGATAAGTCGTGTCTTACCGGGTTGGACTCAAGACGATAGTTACCGGATAAGGCGC  
AGCGGTCCGGGCTGAACGGGGGGTTCGTGCACACAGCCCAGCTTGGAGCGAACGA  
CCTACACCGAACTGAGATACCTACAGCGTGAGCTATGAGAAAGCGCCACGCTTCC  
CGAAGGGAGAAAGGCGGACAGGTATCCGGTAAGCGGCAGGGTTCGGAACAGGAG  
AGCGCACGAGGGAGCTTCCAGGGGGAAACGCCTGGTATCTTTATAGTCTGTCCG  
GTTTCGCCACCTCTGACTTGAGCGTCGATTTTTGTGATGCTCGTCAGGGGGGGCGGA  
GCCTATGGAAAAACGCCAGCAACGCGGCCTTTTTACGGTTCCTGGCCTTTTTGCTGG  
CCTTTTTGCTCACATGTTCTTTCTGCGTTATCCCCTGATTCTGTGGATAACCGTATTA  
CCGCCTTTGAGTGAGCTGATACCGCTCGCCGCAGCCGAACGACCGAGCGCAGCGA  
GTCAGTGAGCGAGGAAGCGGAAGAGCGCCTGATGCGGTATTTTCTCCTTACGCAT  
CTGTGCGGTATTTACACCCGCATATATGGTGCCTCTCAGTACAATCTGCTCTGATG  
CCGCATAGTTAAGCCAGTATACTCCGCTATCGCTACGTGACTGGGTCATGGCTGC  
GCCCCGACACCCGCCAACACCCGCTGACGCGCCCTGACGGGCTTGTCTGCTCCCG  
GCATCCGCTTACAGACAAGCTGTGACCGTCTCCGGGAGCTGCATGTGTGAGAGGT  
TTTACCGTCATCACCGAAACGCGCGAGGCAGCTGCGGTAAAGCTCATCAGCGTG  
GTCGTGAAGCGATTACAGATGTCTGCCTGTTTCATCCGCGTCCAGCTCGTTGAGTT  
TCTCCAGAAGCGTTAATGTCTGGCTTCTGATAAAGCGGGCCATGTTAAGGGCGGTT  
TTTTCTGTTTGGTCACTGATGCCTCCGTGTAAGGGGGATTCTGTTTCATGGGGGTA  
ATGATACCGATGAAACGAGAGAGGATGCTCACGATACGGGTTACTGATGATGAACA  
TGCCCGGTTACTGGAACGTTGTGAGGGTAAACAACCTGGCGGTATGGATGCGGCGG  
GACCAGAGAAAAATCACTCAGGGTCAATGCCAGCGCTTCGTTAATACAGATGTAG  
GTGTTCCACAGGGTAGCCAGCAGCATCCTGCGATGCAGATCCGGAACATAATGGTG  
CAGGGCGCTGACTTCCGCGTTTCCAGACTTTACGAAACACGGAAACCGAAGACCA  
TTCATGTTGTTGCTCAGGTCGACAGACGTTTTGCAGCAGCAGTCGTTTACGTTTCG  
TCGCGTATCGGTGATTCATTCTGCTAACCAGTAAGGCAACCCCGCCAGCCTAGCCG  
GGTCTCAACGACAGGAGCACGATCATGCGCACCCGTGGGGCCGCCATGCCGGCG  
ATAATGGCCTGCTTCTCGCCGAAACGTTTGGTGGCGGGACCAGTGACGAAGGCTT

GAGCGAGGGCGTGCAAGATTCCGAATACCGCAAGCGACAGGCCGATCATCGTCGC  
GCTCCAGCGAAAGCGGTCTCTGCCGAAAATGACCCAGAGCGCTGCCGGCACCTGT  
CCTACGAGTTGCATGATAAAGAAGACAGTCATAAGTGCGGCGACGATAGTCATGCC  
CCGCGCCACCGGAAGGAGCTGACTGGGTTGAAGGCTCTCAAGGGCATCGGTGC  
AGATCCCGGTGCCTAATGAGTGAGCTAACTTACATTAATTGCGTTGCGCTCACTGC  
CCGCTTTCCAGTCGGGAAACCTGTGCTGCCAGCTGCATTAATGAATCGGCCAACGC  
GCGGGGAGAGGCGGTTTTGCGTATTGGGCGCCAGGGTGGTTTTTTCTTTTACCAGT  
GAGACGGGCAACAGCTGATTGCCCTTACCAGCCTGGCCCTGAGAGAGTTGCAGCA  
AGCGGTCCACGCTGGTTTTGCCCCAGCAGGCGAAAATCCTGTTTGATGGTGGTTAA  
CGGCGGGATATAACATGAGCTGTCTTCGGTATCGTCGTATCCCACTACCGAGATATC  
CGCACCAACGCGCAGCCCGGACTCGGTAATGGCGCGCATTGCGCCCAGCGCCATC  
TGATCGTTGGCAACCAGCATCGCAGTGGGAACGATGCCCTCATTAGCATTTCAT  
GGTTTTGTTGAAAACCGGACATGGCACTCCAGTCGCCTTCCCGTTCCGCTATCGGCT  
GAATTTGATTGCGAGTGAGATATTTATGCCAGCCAGCCAGACGCAGACGCGCCGA  
GACAGA ACTTAATGGGCCCCGCTAACAGCGCGATTTGCTGGTGACCCAATGCGACC  
AGATGCTCCACGCCAGTCGCGTACCGTCTTCATGGGAGAAAATAATACTGTTGAT  
GGGTGTCTGGTCAGAGACATCAAGAAATAACGCCGGAACATTAGTGCAGGCAGCT  
TCCACAGCAATGGCATCCTGGTCATCCAGCGGATAGTTAATGATCAGCCCCTGAC  
GCGTTGCGCGAGAAGATTGTGCACCGCCGCTTTACAGGCTTCGACGCCGCTTCGTT  
CTACCATCGACACCACCAGCTGGCACCCAGTTGATCGGCGCGAGATTTAATCGCC  
GCGACAATTTGCGACGGCGCGTGCAGGGCCAGACTGGAGGTGGCAACGCCAATC  
AGCAACGACTGTTTGCCCGCCAGTTGTTGTGCCACGCGGTTGGGAATGTAATTCAG  
CTCCGCCATCGCCGCTTCCACTTTTTCCCGCGTTTTTCGCAGAAACGTGGCTGGCCT  
GGTTCACCACGCGGGAAACGGTCTGATAAGAGACACCGGCATACTCTGCGACATC  
GTATAACGTTACTGGTTTCACATTCACCACCCTGAATTGACTCTCTTCCGGGCGCTA  
TCATGCCATAACCGCGAAAGTTTTGCGCCATTCGATGGTGTCCGGGATCTCGACGC  
TCTCCCTTATGCGACTCCTGCATTAGGAAGCAGCCAGTAGTAGGTTGAGGCCGTT  
GAGCACCGCCGCGCAAGGAATGGTGCATGCAAGGAGATGGCGCCCAACAGTCC  
CCCGGCCACGGGGCCTGCCACCATACCACGCCGAAACAAGCGCTCATGAGCCCG  
AAGTGCGGAGCCCGATCTTCCCATCGGTGATGTCGGCGATATAGGCGCCAGCAAC  
CGCACCTGTGGCGCCGGTATGCCGGCCACGATGCGTCCGGCGTAGAGGATCGAG  
ATCTCGATCCCGCGAAATTAATACGACTCACTATAGGGGAATTGTGAGCGGATAAC  
AATCCCTCTAGAAATAATTTTGTTTAACTTTAAGAAGGAGATATACCATGGGCAG  
CAGCCATCATCATCATCACAGCAGCGGCTGGTGCCGCGCGGCAGCCATATGG  
CTAGCATGACTGGTGGACAGCAAATGGGTCGCGGATCCATGTCAGAAGACAAGAT  
CACCGGAACCTTGGCTTTCCTGCTTCACTGCTGTAAGTTCCTTCCAGTTCG  
GCTATGACATCGGTGTGATCAATGCACCTCAAGAGGTAATAATATCCATTATCGAC  
ATGTTTTGGGTGTTCCACTGGATGACCGGAAAGCTGCCATTAATGACGTCAAT  
GGCACAGACACCCCACTTACAGTCACACCAGCATAACAAACACCAGCTCCCTGGG  
ATGAAGAGGAGACTGAAGGATCTGCTCACATAGTCACTATGCTCTGGTCTCTGTCT  
GTGTCCAGCTTTGAGTGGGCGGAATGGTCGCCTCATTCTTTGGTGGGTGGCTCGG  
GGACAACTTGAAGGATCAAAGCAATGTTGGCTGCAAACAGCCTCTCATTGACT  
GGAGCCCTCTGATGGGATGTTCCAAATTTGGACCGGCACACGCCCTCATATTGC  
TGGACGAAGTGATCAGGACTGTATTGTGGGCTAATTCAGGACTGGTTCCAATGT

ACATTGGAGAGATCGCTCCAACCACACTCAGGGGTGCCCTGGGTACTCTTCACCA  
ACTGGCCCTTGTCACAGGCATTCTTATTAGTCAGATTGCTGGCCTCAGCTTTATTCT  
GGGCAATCAGGATCATTGGCACATCCTACTTGGCCTATCTGCTGTGCCAGCTCTTCT  
GCAGTGTCTGCTACTGCTCTTCTGTCCAGAAAGCCCCAGATACCTTTATATAAAGTT  
GGAAGAGGAAGTCAGGGCAAAGAAAAGCTTGAAGAGACTAAGAGGAACTGAGG  
ATGTCACCAAAGATATTAATGAGATGAAGAAAAGAAAAGGAAGAGGCATCGACTGA  
GCAGAAGGTCTCCGTGATCCAGCTCTTCACGGATGCCAATTACCGACAGCCCATCC  
TCGTGGCGCTGATGCTGCACATGGCCCAGCAGTTCTCAGGAATCAATGGGATATTT  
TACTATTCAACCAGCATTTCAGACAGCTGGCATCAGCCAGCCTGTGTATGCAAC  
CATTGGTGTTGGGGCCATCAACATGATCTTCACGGCTGTCTCTGTGCTGCTTGTGG  
AGAAGGCAGGGCGGCGGACCCTGTTCCTAACCGGGATGATTGGCATGTTTTTCTGC  
ACCATCTTCATGTCGGTGGGACTTGTGCTGCTGGATAAATTCGCCTGGATGAGTTA  
CGTGAGCATGACTGCCATCTTCCTCTTTGTCAGTTTCTTTGAGATTGGGCCAGGTC  
CAATCCCTTGGTTCATGGTTGCTGAATTTTCAGCCAAGGACCCCGTCCTACGGCT  
CTGGCACTGGCTGCCTTCAGCAACTGGGTCTGCAATTTTGTTCATCGCCCTCTGCTT  
CCAGTACATTGCGGACTTCCTTGGGCCTTACGTGTTCTTCCTCTTCGCTGGGGTGG  
TCCTGGTCTTCACCCTGTTTACATTCTTTAAAGTTCCAGAAACCAAAGGAAAGTCT  
TTTGAGGAAATCGCTGCAGAATCCGGAAGAAGAGTGGTTCGGCCCCACCACGCA  
AAGCTGCTGTACAAATGGAATTCCTGGCGTCTTCAGAGAGTGTGTGA AAGCTTGC  
GGCCGCACTCGAGCACCACCACCACCACACTGAGATCCGGCTGCTAACAAAGCC  
CGAAAGGAAGCTGAGTTGGCTGCTGCCACCGCTGAGCAATAACTAGCATAACCCC  
TTGGGGCCTCTAAACGGGTCTTGAGGGGTTTTTTGCTGAAAGGAGGAACTATATCC  
GGAT
